# Supplementary material for: Analysis of duration of risk behaviour for key populations: a literature review
Source: HighWire-hosted journal article supplement (doi:10.1136/sextrans-2012-050647), 2012-11-20
Supplement: sextrans-2012-050647supp_table1.pdf [file sextrans-2012-050647supp_table1.pdf]

Table S1. Data extracted from studies conducted in the Male Clients of Female Sex Workers population

| Region          | Reference                                                                                                                                                                                                                                                                                                                                                   | Methodology     | Sample size | Sample definition                                                                                                                                                                                      | Age                              | Year of data collection        | Location                    | Duration of period paying for sex                                                   |
|-----------------|-------------------------------------------------------------------------------------------------------------------------------------------------------------------------------------------------------------------------------------------------------------------------------------------------------------------------------------------------------------|-----------------|-------------|--------------------------------------------------------------------------------------------------------------------------------------------------------------------------------------------------------|----------------------------------|--------------------------------|-----------------------------|-------------------------------------------------------------------------------------|
| Latin America   | Goldenberg SM, Gallardo Cruz M, Strathdee SA, Nguyen L, Semple SJ, Patterson TL. Correlates of unprotected sex with female sex workers among male clients in Tijuana, Mexico. <i>Sex Transm Dis.</i> 2010 May;37(5):319-24. PubMed PMID: 20081558; PubMed Central PMCID: PMC2861913.                                                                        | Cross-sectional | 394         | Male aged 18 or older who had paid or traded for sex with a FSW in Tijuana during the past 4 months were recruited in Tijuana's Zona Roja.                                                             | Median: 36 (IQR: 28–44)          | 2008                           | Tijuana, Mexico             | Median (IQR): 7 (2, 17)                                                             |
| Latin America   | Patterson TL, Goldenberg S, Gallardo M, Lozada R, Semple SJ, Orozovich P, Abramovitz D, Strathdee SA. Correlates of HIV, sexually transmitted infections, and associated high-risk behaviors among male clients of female sex workers in Tijuana, Mexico. <i>AIDS.</i> 2009 Aug 24;23(13):1765-71. PubMed PMID: 19584699; PubMed Central PMCID: PMC2804438. | Cross-sectional | 343         | To be eligible, men had to be residents of Tijuana or San Diego County, of 18 years or older, and to have paid or traded for sex with a FSW in Tijuana during the past 4 months.                       | Mean: 36.6 (range: 19–68 years), | 2008                           | Tijuana, Mexico             | They had been having sex with FSWs for 10.8 years                                   |
| Central America | Couture MC, Soto JC, Akom E, Labbé AC, Joseph G, Zunzunegui MV. Clients of female sex workers in Gonaives and St-Marc, Haiti characteristics, sexually transmitted infection prevalence and risk factors. <i>Sex Transm Dis.</i> 2008 Oct;35(10):849-55. PubMed PMID: 18580821.                                                                             | Cross-sectional | 378         | A client was defined as a man who was present at the commercial sex site during fieldwork and who had had a sexual encounter in the last 3 months with an FSW for which he had paid in money or goods. | Mean: 24                         | December and January 2006–2007 | St-Marc and Gonaives, Haiti | The majority had been frequenting FSWs for 4 years or more (64.0%; mean 6.3 years). |

| Region  | Reference                                                                                                                                                                                                                                                                                                                                                                                               | Methodology     | Sample size | Sample definition                                                                                                                                                             | Age                     | Year of data collection            | Location                                                                          | Duration of period paying for sex                                                                    |
|---------|---------------------------------------------------------------------------------------------------------------------------------------------------------------------------------------------------------------------------------------------------------------------------------------------------------------------------------------------------------------------------------------------------------|-----------------|-------------|-------------------------------------------------------------------------------------------------------------------------------------------------------------------------------|-------------------------|------------------------------------|-----------------------------------------------------------------------------------|------------------------------------------------------------------------------------------------------|
| Asia    | Jin X, Smith K, Chen RY, Ding G, Yao Y, Wang H, Qian HZ, Chang D, Wang G, Wang N. HIV prevalence and risk behaviors among male clients of female sex workers in Yunnan, China. <i>J Acquir Immune Defic Syndr.</i> 2010 Jan 1;53(1):131-5. PubMed PMID: 19730110; PubMed Central PMCID: PMC2799544.                                                                                                     | Cross-sectional | 315         |                                                                                                                                                                               | Median: 36 (IQR, 23–45) | 2008                               | Yunnan, China                                                                     | Median of 30 years, calculated by subtracting from the median age, the median age at first paid sex. |
| Asia    | Subramanian T, Gupte MD, Paranjape RS, Brahman GN, Ramakrishnan L, Adhikary R, Kangusamy B, Thomas BE, Kallam S, Girish CP; IBBA Study Team. HIV, sexually transmitted infections and sexual behaviour of male clients of female sex workers in Andhra Pradesh, Tamil Nadu and Maharashtra, India: results of a cross-sectional survey. <i>AIDS.</i> 2008 Dec;22 Suppl 5:S69-79. PubMed PMID: 19098481. | Cross-sectional | 4821        | Clients of FSW, operationally defined as men between 18 and 60 years of age who had sex with FSW in exchange for money within the past month were eligible for participation. | Median: 30              | Between October 2006 and June 2007 | 12 districts in three states in India: Andhra Pradesh, Maharashtra and Tamil Nadu | 9 years, calculated by subtracting from the median age, the median age at first paid sex.            |
| Oceania | Xantidis L, McCabe MP. Personality characteristics of male clients of female commercial sex workers in Australia. <i>Arch Sex Behav.</i> 2000 Apr;29(2):165-76. PubMed PMID: 10842724.                                                                                                                                                                                                                  | Cross-sectional | 60          |                                                                                                                                                                               | Mean: 32.83 (SD: 8.47)  |                                    | Melbourne, Australia                                                              | Mean of 9.74, calculated by subtracting from the mean age, the mean age at first paid sex.           |

| Region | Reference                                                                                                                                                                                                                                                                                                                                                                 | Methodology     | Sample size | Sample definition                                                                                                                      | Age                        | Year of data collection | Location                                              | Duration of period paying for sex                                                                              |
|--------|---------------------------------------------------------------------------------------------------------------------------------------------------------------------------------------------------------------------------------------------------------------------------------------------------------------------------------------------------------------------------|-----------------|-------------|----------------------------------------------------------------------------------------------------------------------------------------|----------------------------|-------------------------|-------------------------------------------------------|----------------------------------------------------------------------------------------------------------------|
| Africa | Lowndes CM, Alary M, Gnintoungbé CA, Bédard E, Mukenge L, Geraldo N, Jossou P, Lafia E, Bernier F, Baganizi E, Joly J, Frost E, Anagonou S. Management of sexually transmitted diseases and HIV prevention in men at high risk: targeting clients and non-paying sexual partners of female sex workers in Benin. AIDS. 2000 Nov 10;14(16):2523-34. PubMed PMID: 11101064. | Cross-sectional | 330         | Men who came to one of the prostitution venues where the project was working, and who paid to have sex with a female sex worker there. | Median: 25.5 (IQR: 17,53)  | 1998                    | Cotonou, Benin                                        | Median of 2 years, average of 4 years (range: 0±29 years). 21.9% have been visiting a FSW for less than a year |
| Africa | Voeten HA, Egesah OB, Ondiege MY, Varkevisser CM, Habbema JD. Clients of female sex workers in Nyanza province, Kenya: a core group in STD/HIV transmission. Sex Transm Dis. 2002 Aug;29(8):444-52. PubMed PMID: 12172528.                                                                                                                                                | Cross-sectional | 64          |                                                                                                                                        | Median: 31 (range: 20, 58) | 1999                    | Kisumu and the rural districts Siaya and Bondo, Kenya | 7 years, calculated by subtracting from the median age, the median age at first paid sex.                      |
