# Supplementary material for: Analysis of duration of risk behaviour for key populations: a literature review
Source: HighWire-hosted journal article supplement (doi:10.1136/sextrans-2012-050647), 2012-11-20
Supplement: sextrans-2012-050647supp_table2.pdf [file sextrans-2012-050647supp_table2.pdf]

Table S2. Data extracted from studies conducted in the female sex workers population

| Region | Reference                                                                                                                                                                                                           | Methodology           | Sample size | Sample definition                                                                                                                        | Sample characteristics                                                            | Year of data collection     | Location       | Duration of sex work                      |
|--------|---------------------------------------------------------------------------------------------------------------------------------------------------------------------------------------------------------------------|-----------------------|-------------|------------------------------------------------------------------------------------------------------------------------------------------|-----------------------------------------------------------------------------------|-----------------------------|----------------|-------------------------------------------|
| Africa | Alary M, Mukenge-Tshibaka L, Bernier F, et al. Decline in the prevalence of HIV and sexually transmitted diseases among female sex workers in Cotonou, Benin, 1993-1999. AIDS. 2002 Feb 15;16(3):463-70.            | Cross-sectional study | 365         | Those who consulted for STD screening at the clinic dedicated to FSW.                                                                    | Mean age was 30 years and mean of number of clients on the previous week was 26.  | 1995 to 1996                | Cotonou, Benin | Mean of 2.4 years                         |
| Africa | Alary M, Mukenge-Tshibaka L, Bernier F, et al. Decline in the prevalence of HIV and sexually transmitted diseases among female sex workers in Cotonou, Benin, 1993-1999. AIDS. 2002 Feb 15;16(3):463-70.            | Cross-sectional study | 591         | Those who consulted for STD screening at the clinic dedicated to FSW.                                                                    | Mean age was 28.4 years and mean of number of clients on the previous week was 13 | 1998 to 1999                | Cotonou, Benin | Mean of 2.6 years                         |
| Africa | Asamoah-Adu C, Khonde N, Avorkliah M, et al. HIV infection among sex workers in Accra: need to target new recruits entering the trade. J Acquir Immune Defic Syndr. 2001 Dec 1;28(4):358-66. PubMed PMID: 11707673. | Cross-sectional study | 1013 FSW    | SW working out of their homes (seaters) or finding customers in bars, hotels, brothels or on the street (roamers) attending STI clinics. | Age ranged from 13 to 67 years (median, 28 years)                                 | March 1997 to February 1999 | Accra, Ghana   | From 1 week to 30 years (median, 2 years) |

| Region | Reference                                                                                                                                                                                                                                                           | Methodology           | Sample size          | Sample definition                                                                     | Sample characteristics                                                               | Year of data collection | Location       | Duration of sex work                                               |
|--------|---------------------------------------------------------------------------------------------------------------------------------------------------------------------------------------------------------------------------------------------------------------------|-----------------------|----------------------|---------------------------------------------------------------------------------------|--------------------------------------------------------------------------------------|-------------------------|----------------|--------------------------------------------------------------------|
| Africa | Dada AJ, Ajayi AO, Diamondstone L, et al. A Serosurvey of Haemophilus ducreyi, Syphilis, and Herpes Simplex Virus Type 2 and Their Association With Human Immunodeficiency Virus Among Female Sex Workers in Lagos, Nigeria. Sex Transm Dis. 1998 May;25(5):237-42. | Cross-sectional study | 84 lower-class FSW   | Home-based FSW that charged no more than 0.5 dollars for sexual encounter.            | Mean age was 29 (IC95%: 27.5 - 30.5) and mean number of clients last day was 4.92.   | 1990 to 1991            | Lagos, Nigeria | Mean of duration of sex work in months: 39.2 (IC 95%: 32.7 - 45.1) |
| Africa | Dada AJ, Ajayi AO, Diamondstone L, et al. A Serosurvey of Haemophilus ducreyi, Syphilis, and Herpes Simplex Virus Type 2 and Their Association With Human Immunodeficiency Virus Among Female Sex Workers in Lagos, Nigeria. Sex Transm Dis. 1998 May;25(5):237-42. | Cross-sectional study | 624 middle class FSW | Motel-based FSW that charged from 0.5 to less than 5 dollars per sexual encounter.    | Mean age was 26.3 (IC95%: 25.9 - 26.7) and mean number of clients last day was 5.76. | 1990 to 1991            | Lagos, Nigeria | Mean of duration of sex work in months: 35.3 (IC 95%: 32.6 - 36.6) |
| Africa | Dada AJ, Ajayi AO, Diamondstone L, et al. A Serosurvey of Haemophilus ducreyi, Syphilis, and Herpes Simplex Virus Type 2 and Their Association With Human Immunodeficiency Virus Among Female Sex Workers in Lagos, Nigeria. Sex Transm Dis. 1998 May;25(5):237-42. | Cross-sectional study | 88 upper class FSW   | FSW that solicited clients in streets, international hotels, night clubs and casinos. | Mean age was 23.3 (IC95%: 22.4 - 24.2) and mean number of clients last day was 1.93  | 1990 to 1991            | Lagos, Nigeria | Mean of duration of sex work in months: 22.6 (IC 95%: 19.2 - 25.1) |

| Region | Reference                                                                                                                                                                                                                                            | Methodology                                              | Sample size | Sample definition                                                                   | Sample characteristics                                                         | Year of data collection           | Location                                 | Duration of sex work                                                                                                                                                               |
|--------|------------------------------------------------------------------------------------------------------------------------------------------------------------------------------------------------------------------------------------------------------|----------------------------------------------------------|-------------|-------------------------------------------------------------------------------------|--------------------------------------------------------------------------------|-----------------------------------|------------------------------------------|------------------------------------------------------------------------------------------------------------------------------------------------------------------------------------|
| Africa | Delaporte E, Buvé A, Nzila N, et al. HTLV-I infection among prostitutes and pregnant women in Kinshasa, Zaïre: how important is high-risk sexual behavior? J Acquir Immune Defic Syndr Hum Retrovirol. 1995 Apr 15;8(5):511-5. PubMed PMID: 7697449. | Cross-sectional study                                    | 1183 FSW    |                                                                                     | 55% were 25 years old or less.                                                 | Between May 1988 and August 1988. | Kinshasa, República Democrática do Congo | 16.8% were working for less than a year; 48.5% from 1 year to less than 5 years; 23% were sex workers for five to less than 10 years and; 11.7% were working for 10 or more years. |
| Africa | Fowke KR, Nagelkerke NJ, Kimani J, et al. Resistance to HIV-1 infection among persistently seronegative prostitutes in Nairobi, Kenya. Lancet. 1996 Nov 16;348(9038):1347-51. PubMed PMID: 8918278.                                                  | Community-based cohort study of incident HIV-1 infection | 424 FSW     | All FSW in the area were eligible, but they had to be initially HIV-1-seronegative. | 40% were sex workers for less than 3 years and the rest for more than 3 years. | Between 1985 and 1994             | In a slum area of Nairobi, Kenya         |                                                                                                                                                                                    |

| Region | Reference                                                                                                                                                                                                                                                                                                                                             | Methodology                                                                      | Sample size                                                                                                                                                                                                                                        | Sample definition                                                                                                         | Sample characteristics                                                                                                                            | Year of data collection                                                   | Location               | Duration of sex work                                                                                                                                                                                                                                    |
|--------|-------------------------------------------------------------------------------------------------------------------------------------------------------------------------------------------------------------------------------------------------------------------------------------------------------------------------------------------------------|----------------------------------------------------------------------------------|----------------------------------------------------------------------------------------------------------------------------------------------------------------------------------------------------------------------------------------------------|---------------------------------------------------------------------------------------------------------------------------|---------------------------------------------------------------------------------------------------------------------------------------------------|---------------------------------------------------------------------------|------------------------|---------------------------------------------------------------------------------------------------------------------------------------------------------------------------------------------------------------------------------------------------------|
| Africa | Ghys PD, Diallo MO, Ettiègne-Traoré V, Kalé K, Tawil O, Caraël M, Traoré M, Mah-Bi G, De Cock KM, Wiktor SZ, Laga M, Greenberg AE. Increase in condom use and decline in HIV and sexually transmitted diseases among female sex workers in Abidjan, Côte d'Ivoire, 1991-1998. AIDS. 2002 Jan 25;16(2):251-8. PubMed PMID: 11807310                    | Multiyear cross-sectional study and biannual community-based behavioral surveys. | 356 in 1992; 778 in 1993; 607 in 1994; 832 in 1995; 916 in 1996; 576 in 1997; and 853 in 1998. 2281 interviewed in the community-based surveys (329, 602, 850, and 500 female sex workers participated in 1991, 1993, 1995, and 1997 respectively. | Sex workers who attended Clinique de Confiance for the first time and FSW interviewed during the community based surveys. | Clinique: median age 30 in 1992 compared with 23 in 1998. Survey: median age was 26 in 1991, 28 in 1993, 25 in 1995, 26 in 1997.                  | From 1991 to 1998                                                         | Abidjan, Côte d'Ivoire | Clinique: median of 3 years from 1992 to 1994; 2 years in 1995 and 1996; 1.5 in 1997 and 0.6 in 1998. Survey: median of 2 years in 1991 (IQR:1 to 4); 3 years in 1993 (IQR: 2 to 5); 3 years in 1995 (IQR:1 to 5); and 2 years in 1997 (IQR: 0.7 to 4). |
| Africa | Jennes W, Sawadogo S, Koblavi-Dème S, Vuylsteke B, Maurice C, Roels TH, Chorba T, Nkengasong JN, Kestens L. Cellular human immunodeficiency virus (HIV)-protective factors: a comparison of HIV-exposed seronegative female sex workers and female blood donors in Abidjan, Côte d'Ivoire. J Infect Dis. 2003 Jan 15;187(2):206-14. Epub 2002 Dec 30. | Ongoing surveillance study in a Confidential clinic                              | 40 HIV-seronegative and 25 HIV seropositive FSWs                                                                                                                                                                                                   |                                                                                                                           | The median age of the 40 seronegative was 22 years (IQR:21–28 years), compared with 28 years (IQR,23–36 years) for the 25 HIV-seropositive FSWs . | During the months of May 2000, February, and March 2001, and October 2001 | Abidjan, Côte d'Ivoire | The median duration of commercial sex work reported by seronegative FSWs was 14months (IQR:6–36months).                                                                                                                                                 |

| Region | Reference                                                                                                                                                                                                                                                        | Methodology                                                                                                               | Sample size | Sample definition                   | Sample characteristics                                                                                                                                                                                       | Year of data collection         | Location                                | Duration of sex work                                                                                                                                                                           |
|--------|------------------------------------------------------------------------------------------------------------------------------------------------------------------------------------------------------------------------------------------------------------------|---------------------------------------------------------------------------------------------------------------------------|-------------|-------------------------------------|--------------------------------------------------------------------------------------------------------------------------------------------------------------------------------------------------------------|---------------------------------|-----------------------------------------|------------------------------------------------------------------------------------------------------------------------------------------------------------------------------------------------|
| Africa | Jennes W, Vuylsteke B, Borget MY, et al. HIV-specific T helper responses and frequency of exposure among HIV-exposed seronegative female sex workers in Abidjan, Cote d'Ivoire. J Infect Dis. 2004 Feb 15;189(4):602-10. Epub 2004 Jan 29. PubMed PMID:14767812. | Cross-sectional study.                                                                                                    | 27 FSW      | HIV-seronegative FSWs were enrolled | The mean age was 23 years (range, 18–52 years)                                                                                                                                                               | November 1999 and May 2000      | Abidjan, Côte d'Ivoire                  | The median was 6 months (range, 1–120 months). Three FSWs (11%) reported doing commercial sex work for 3 years or more, 11 (41%) from 6 months to 3 years, and 13 (48%) for 6 months or less.. |
| Africa | Kaul R, Kimani J, Nagelkerke Njet al. Risk factors for genital ulcerations in Kenyan sex workers. The role of human immunodeficiency virus type 1 infection. Sex Transm Dis. 1997 Aug;24(7):387-92. PubMed PMID: 9263358.                                        | Subsample from a cohort study, was stratified to result in a 50% HIV-1 seroprevalence within the subcohort at enrollment. | 302 FSW     |                                     | One hundred fifty-seven women (52%) were initially HIV-1 seropositive, and 145 were seronegative. The mean age of the seronegative was 30.7 (SD: 7) and the mean age of the seropositive was 31.5 (SD: 5.2). | Cohort was established in 1991. | The Pumwani slum area of Nairobi, Kenya | The mean duration of prostitution of the seronegative was 5.4 (SD: 5.4) and for the seropositive was 6.0 (SD: 4.4).                                                                            |

| Region | Reference                                                                                                                                                                                                                                       | Methodology                                                                                                            | Sample size                                 | Sample definition                                                                                   | Sample characteristics                      | Year of data collection                 | Location                     | Duration of sex work                                                                                                  |
|--------|-------------------------------------------------------------------------------------------------------------------------------------------------------------------------------------------------------------------------------------------------|------------------------------------------------------------------------------------------------------------------------|---------------------------------------------|-----------------------------------------------------------------------------------------------------|---------------------------------------------|-----------------------------------------|------------------------------|-----------------------------------------------------------------------------------------------------------------------|
| Africa | Lavreys L, Chohan V, Overbaugh J, et al. Hormonal contraception and risk of cervical infections among HIV-1-seropositive Kenyan women. AIDS. 2004 Nov 5;18(16):2179-84. PubMed PMID: 15577651373:                                               | A prospective cohort study of 242 commercial sex workers in Mombasa, Kenya, followed from the time of HIV-1 infection. | 242 FSW who seroconverted during the study. | Seronegative FSW attending a municipal STI clinic enrolled in the cohort.                           | Median age was 29 (IQR: 25 to 34)           | Between February 1993 and January 2003, | Mombasa, Kenya               | Median duration of prostitution was 4 years (IQR: 2 to 6).                                                            |
| Africa | Mulanga-Kabeya C, Morel E, Patrel Det al. Prevalence and risk assessment for sexually transmitted infections in pregnant women and female sex workers in Mali: is syndromic approach suitable for screening? Sex Transm Inf. 1999; 75: 358-360. | A cross-sectional study.                                                                                               | 284 FSW                                     | 191 in Bamako and 93 in Sikasso                                                                     | Mean age was 27 years.                      | Jun-97                                  | Sikasso and Bamako, Mali     | Mean duration of 4.2 years.                                                                                           |
| Africa | Nagot N, Ouangré A, Ouedraogo A, et al. Spectrum of Commercial Sex Activity in Burkina Faso: Classification Model and Risk of Exposure to HIV. J Acquir Immune Defic Syndr. 2002 Apr 15;29(5):517-21.                                           | Open-cohort study to                                                                                                   | 447 FSW                                     | FSW were divided into 6 categories: Seaters, Roamers Bar waitresses, Sellers, Cabarets and Students | Median age was 26 with a range of 15 to 56. | From October 1998 to June 2000          | Bobo Dioulasso, Burkina Faso | 27% were working for one year or less; 44% from 2 to 5 years; 17% from 6 to 10 years and 12 % for more than 10 years. |

| Region | Reference                                                                                                                                                                                                                                                                | Methodology                                                             | Sample size | Sample definition                                                                                                      | Sample characteristics                                                                                             | Year of data collection                                                             | Location                                                                                              | Duration of sex work                                                                                                                           |
|--------|--------------------------------------------------------------------------------------------------------------------------------------------------------------------------------------------------------------------------------------------------------------------------|-------------------------------------------------------------------------|-------------|------------------------------------------------------------------------------------------------------------------------|--------------------------------------------------------------------------------------------------------------------|-------------------------------------------------------------------------------------|-------------------------------------------------------------------------------------------------------|------------------------------------------------------------------------------------------------------------------------------------------------|
| Africa | Phillipon M, Saada M, Ali Kamil M, et al. Fréquentation de un centre de santé par lés prostituées clandestines à Djibouti. Cahiers Santé. 1997; 7; 5:10.                                                                                                                 | Cross-sectional study                                                   | 243 FSW     | FSW that consulted during the first 4 months of 1995 at the Le Centre de Phrofilaxie                                   | The mean age was 23.1 years (range, 15 to 37 years) and SD of 4.1.                                                 | summer of 1995                                                                      | Djibouti, Ethiopia                                                                                    | The mean duration of prostitution was 8.4 months and the median 3 months. It ranged from 6 days to 10 years.                                   |
| Africa | Ramjee G, Williams B, Gouws E, et al. The impact of incident and prevalent herpes simplex virus-2 infection on the incidence of HIV-1 infection among commercial sex workers in South Africa. J Acquir Immune Defic Syndr. 2005 Jul 1;39(3):333-9. PubMed PMID: 15980695 | Multicenter vaginal microbicide phase 3 clinical trial funded by UNAIDS | 187 FSW.    | Sex workers from 5 truck stops.                                                                                        | The average age of the women was 25 years;                                                                         | The year of data collection was not mentioned, but the paper was published in 2005. | 5 truck stops between The port city of Durban and the commercial center of Johannesburg, South Africa | They had been doing sex work for an average of 2.5 years                                                                                       |
| Africa | Cameron DW, Ngugi EN, Ronald AR, et al. Condom Use Prevents Genital Ulcers in Women Working as Prostitutes: Influence of Human Immunodeficiency Virus Infection. Sex Transm Dis. 1991 Jul-Sep;18(3):188-91                                                               | Cross-sectional study.                                                  | 378 FSW     | 119 with genital ulcer and 250 without it. Women who consulted at a Nairobi city commission maternal/child health care | The mean age of the women who had genital ulcer was 30 (SD: 7) and of those who did not have ulcer was 30 (SD: 6). | 1987 - 1988                                                                         | Pumwani, Nairobi                                                                                      | The mean duration of sex work of the women who had genital ulcer was 4.5 years (SD: 3) and of those who did not have ulcer wa/s 5.1 (SD: 4.1). |

| Region | Reference                                                                                                                                                                                                                                             | Methodology                                                  | Sample size | Sample definition                                                                                                 | Sample characteristics                                                                                                                         | Year of data collection     | Location                                                    | Duration of sex work                                                                                                                                               |
|--------|-------------------------------------------------------------------------------------------------------------------------------------------------------------------------------------------------------------------------------------------------------|--------------------------------------------------------------|-------------|-------------------------------------------------------------------------------------------------------------------|------------------------------------------------------------------------------------------------------------------------------------------------|-----------------------------|-------------------------------------------------------------|--------------------------------------------------------------------------------------------------------------------------------------------------------------------|
| Africa | Kayembe PK, Mapatano MA, Busangu AF, et al. Determinants of consistent condom use among female commercial sex workers in the Democratic Republic of Congo: implications for interventions. Sex Transm Infect. 2008 Jun;84(3):202-6. Epub 2007 Nov 30. | Cross-sectional study using time location sampling technique | 2638 FSWs   |                                                                                                                   | Age at first paid sex: 18, ranging from 15 to 21.                                                                                              | January 2005 to March 2006  | 5 provincial capital cities of Republic Democratic of Congo | 13.9 % were sex workers for less than a year; 14.3% for 1 year; 47.8% from 2 to 5 years; and 24% for 6 or more years.                                              |
| Africa | Langley CL, Benga-De E, Critchlow CW, et al. HIV-1, HIV-2, human papillomavirus infection and cervical neoplasia in high-risk African women. AIDS. 1996 Apr;10(4):413-7.                                                                              | Cross-sectional                                              | 759 FSWs    | FSWs that attended a DST clinic. 619 HIV free; 68 HIV-1 positive; 58 HIV-2 positive; and 14 HIV 1 and 2 positive. | Mean of age was 29+-6.9 for HIV free; 32.4+-7.5 for HIV1 positive; 32.2+-8.2 for HIV2 positive; and 29.8+- 6.3 for HIV 1 and 2 positive women. | February 1990 to March 1993 | Dakar, Senegal                                              | Mean of sex work duration in years was 2.3+-3.2 for HIV free; 2.9+-4.3 for HIV1 positive; 3.2+-4.3 for HIV2 positive; and 1.3+-1.8 for HIV 1 and 2 positive women. |
| Africa | Mann JM, Nzilambi N, Piot P, Bosenge N, Kalala M, Francis H, Colebunders RC, Azila PK, Curran JW, Quinn TC. HIV infection and associated risk factors in female prostitutes in Kinshasa, Zaire. AIDS. 1988 Aug;2(4):249-54.                           | Cross-sectional                                              | 377 FSW     | Women that charged specific amounts of money for brief or nightlong sexual services.                              | Median age was 24 ranging from 14 to 50. Mean of 3.7 sexual partners during previous week, 19.9 previous month and 158 previous year.          | 1985                        | Kinshasa, República Democrática do Congo                    | Median: 2 years; mean: 3.2 years; range: 2 weeks to 18 years.                                                                                                      |



| Region | Reference                                                                                                                                                                                                                     | Methodology     | Sample size | Sample definition                                                                                                                                                                                               | Sample characteristics                                                                                                                                                                                | Year of data collection | Location                                 | Duration of sex work                                                                                                      |
|--------|-------------------------------------------------------------------------------------------------------------------------------------------------------------------------------------------------------------------------------|-----------------|-------------|-----------------------------------------------------------------------------------------------------------------------------------------------------------------------------------------------------------------|-------------------------------------------------------------------------------------------------------------------------------------------------------------------------------------------------------|-------------------------|------------------------------------------|---------------------------------------------------------------------------------------------------------------------------|
| Africa | Ngugi EN, Plummer FA, Simonsen JN, et al. Prevention of transmission of human immunodeficiency virus in Africa: effectiveness of condom promotion and health education among prostitutes. Lancet. 1988 Oct 15;2(8616):887-90. | Cohort          | 363 FSW     | The FSW were divided in 3 groups: 91 in group 1 (enrolled in the initial cohort that received counseling); 67 in group 2 (enrolled in the initial cohort without counseling) and group 3 (enrolled afterwards). | Mean age for groups 1, 2 and 3 respectively were: 33+-5, 30+-5 and 31+-6. And the mean number of partners daily were: 3.8+-2, 3.0+-2.5 and 5.7+-3.1.                                                  | 1985                    | Nairobi, Kenia                           | The mean duration of sex work in months for the 3 groups were, respectively: 45 (22.8), 35.3 (21.2) and 33.8 (26.5).      |
| Africa | Nzila N, Laga M, Thiam MA, et al. HIV and other sexually transmitted diseases among female prostitutes in Kinshasa. AIDS. 1991 Jun;5(6):715-21.                                                                               | Cross-sectional | 1226 FSW    | They were divided into 3 groups: 448 home-based, 693 brothel-based and 85 street-based                                                                                                                          | The mean age and mean number of partners per week were, respectively: 24.8 (5.8) and 8 (7.9) for hotel-based; 28.4 (7.9) and 8.1 (8.5) for home-based; and 21.2 (4.7) and 9.4 (8.7) for street-based. | 1988/1989               | Kinshasa, República Democrática do Congo | The mean duration of sex work in months were 41.9 (46) for hotel-based; 72.6 home-based; and 56.2 (108) for street-based. |

| Region | Reference                                                                                                                                                                                                                                                                                                                                             | Methodology     | Sample size | Sample definition                                                                   | Sample characteristics                                                            | Year of data collection    | Location                                                | Duration of sex work                                                                                                                                                                                          |
|--------|-------------------------------------------------------------------------------------------------------------------------------------------------------------------------------------------------------------------------------------------------------------------------------------------------------------------------------------------------------|-----------------|-------------|-------------------------------------------------------------------------------------|-----------------------------------------------------------------------------------|----------------------------|---------------------------------------------------------|---------------------------------------------------------------------------------------------------------------------------------------------------------------------------------------------------------------|
| Africa | Pepin J, Dunn D, Gaye I, et al. HIV-2 infection among prostitutes working in The Gambia: association with serological evidence of genital ulcer diseases and with generalized lymphadenopathy. AIDS. 1991 Jan;5(1):69-75.                                                                                                                             | Cross-sectional | 346 FSWs    |                                                                                     |                                                                                   | April 1988 to January 1989 | Bnnjul, Serrakunda, Farafenni, Soma and Basse in Gambia | 19.7% were sex workers for less than 12 months, 18.8% from 12 to 23 years. 14.7% from 24 to 35 years, 16.8 from 36 to 47 months and 30.1% for 48 months or more.                                              |
| Africa | Anzala OA, Nagelkerke NJ, Bwayo JJ, et al. Rapid progression to disease in African sex workers with human immunodeficiency virus type 1 infection. J Infect Dis. 1995 Mar;171(3):686-9. Erratum in: J Infect Dis 1996 Jun;173(6):1529. PubMed PMID:7876618.                                                                                           | Cohort          | 160 FSWs    | FSWs that were enrolled in the cohort in 1985 and 1986 and seroconverted until 1991 | Mean of age was 30.9 (7.2) and mean number of sexual partners per day was 5 (4.2) | 1985 to 1991               | Nairobi, Kenia                                          | Mean of 4.7 (4.9) years at seroconversion.                                                                                                                                                                    |
| Africa | Kanki P, M'Boup S, Marlink R, Travers K, Hsieh CC, Gueye A, Boye C, Sankalé JL, Donnelly C, Leisenring W, et al. Prevalence and risk determinants of human immunodeficiency virus type 2 (HIV-2) and human immunodeficiency virus type 1 (HIV-1) in west African female prostitutes. Am J Epidemiol. 1992 Oct 1;136(7):895-907. PubMed PMID: 1442755. | Cohort          | 1275 FSWs   | Registered FSWs visiting a clinic                                                   |                                                                                   | 1985                       | Dakar, Senegal                                          | It is actually the amount of years as a registered prostitute, what may underestimate the sex work duration. 70.5% were sex workers for 1 to 9 years; 27.5% from 10 to 19 years; and 1.7% for 20 to 29 years. |

| Region | Reference                                                                                                                                                                                                          | Methodology | Sample size | Sample definition                                                                     | Sample characteristics                                                                                                                                                                                                                                                                                                         | Year of data collection | Location       | Duration of sex work                                                                                                                             |
|--------|--------------------------------------------------------------------------------------------------------------------------------------------------------------------------------------------------------------------|-------------|-------------|---------------------------------------------------------------------------------------|--------------------------------------------------------------------------------------------------------------------------------------------------------------------------------------------------------------------------------------------------------------------------------------------------------------------------------|-------------------------|----------------|--------------------------------------------------------------------------------------------------------------------------------------------------|
| Africa | Baeten JM; Richardson BA; Martin HL, et al. Trends in HIV-1 Incidence in a Cohort of Prostitutes in Kenya: Implications for HIV-1 Vaccine Efficacy Trials. J Acquir Immune Defic Syndr; 24(5):458-64, 2000 Aug 15. | Cohort      | 953 FSWs    | Enrolled in the cohort from 1993 to 1997. 788 returned for follow up and 165 did not. | Those who returned had median of age 26, median of 1 sexual partner per week, mean of 2.2, ranging from 0 to 10, and mean of 2.2 sexual encounters per week, median of 2, ranging from 0 to 13. Those who did not return had median of age 24, mean of 1.4 sexual partner per week and mean of 1.4 sexual encounters per week. | From 1993 to 1997       | Mombasa, Kenya | Among those who returned for follow-up, the median was 1.5 years ranging from 0 to 24. Among those who did not return the median was 0.75 years. |

| Region | Reference                                                                                                                                                                                                                                                                 | Methodology | Sample size | Sample definition                 | Sample characteristics                                                        | Year of data collection | Location            | Duration of sex work                                                                                                                                                             |
|--------|---------------------------------------------------------------------------------------------------------------------------------------------------------------------------------------------------------------------------------------------------------------------------|-------------|-------------|-----------------------------------|-------------------------------------------------------------------------------|-------------------------|---------------------|----------------------------------------------------------------------------------------------------------------------------------------------------------------------------------|
| Africa | Kanki P, M'Boup S, Marlink R, et al. Prevalence and risk determinants of human immunodeficiency virus type 2 (HIV-2) and human immunodeficiency virus type 1 (HIV-1) in west African female prostitutes. Am J Epidemiol. 1992 Oct 1;136(7):895-907. PubMed PMID: 1442755. | Cohort      | 278 FSWs    | Registered FSWs visiting a clinic |                                                                               | 1987                    | Ziguinchor, Senegal | It is actually the amount of years as a registered prostitute, what may underestimate the sex work duration. 100% were sex workers for 1 to 9 years.                             |
| Africa | Kanki P, M'Boup S, Marlink R, et al. Prevalence and risk determinants of human immunodeficiency virus type 2 (HIV-2) and human immunodeficiency virus type 1 (HIV-1) in west African female prostitutes. Am J Epidemiol. 1992 Oct 1;136(7):895-907. PubMed PMID: 1442755. | Cohort      | 157 FSWs    | Registered FSWs visiting a clinic |                                                                               | 1987                    | Kaolack, Senegal    | It is actually the amount of years as a registered prostitute, what may underestimate the sex work duration. 67.5% were sex workers for 1 to 9 years; 32.5% from 10 to 19 years. |
| Africa | Simonsen JN, Plummer FA, Ngugi EN, et al. HIV infection among lower socioeconomic strata prostitutes in Nairobi. AIDS. 1990 Feb;4(2):139-44. PubMed PMID: 2328096.                                                                                                        | Cohort      | 418 FSWs    | Living in a slum in Nairobi       | Mean age was 29.2 +- 6.5. Mean number of sex partners per day was 3.7 +-2.29. | 1985                    | Nairobi, Kenya      | Mean of 33.1 months +- 47.9                                                                                                                                                      |

| Region | Reference                                                                                                                                                                                                                                       | Methodology                                                               | Sample size | Sample definition                                                                                                                                                        | Sample characteristics                                | Year of data collection                  | Location                                                            | Duration of sex work                                                                |
|--------|-------------------------------------------------------------------------------------------------------------------------------------------------------------------------------------------------------------------------------------------------|---------------------------------------------------------------------------|-------------|--------------------------------------------------------------------------------------------------------------------------------------------------------------------------|-------------------------------------------------------|------------------------------------------|---------------------------------------------------------------------|-------------------------------------------------------------------------------------|
| Africa | Willerford D, Bwayo JJ, Hensel M, Emonyi W, Plummer FA, Ngugi EM, Nagelkerke N, Gallatin WM, Kreiss J. Human Immunodeficiency Virus Infection among High-Risk Seronegative Prostitutes in Nairobi. JID 1993; 167 (June)                         | Cohort                                                                    | 56 FSWs     | HIV-seronegative FSWs were enrolled                                                                                                                                      | Mean age was 32. Average of 35 sex partners per week. | 1985                                     | Nairobi, Kenia                                                      | Mean of 6 years.                                                                    |
| Europe | Baars JE, Boon BJ, Garretsen HF, et al. Vaccination uptake and awareness of a free hepatitis B vaccination program among female commercial sex workers. Womens Health Issues. 2009 Jan-Feb;19(1):61-9. Epub 2008 Oct 25. PubMed PMID: 18951815. | Cross-sectional study based on ethnographic mapping and targeted sampling | 259 FSW     | women who engage in sexual behavior for money                                                                                                                            |                                                       | Between September 2004 and February 2006 | 3 regions in the Netherlands: Rotterdam, Utrecht, and South Limburg | Mean of 66.88 months, SD of 70.73.                                                  |
| Europe | Vioque J, Hernández-Aguado I, Fernandez García E, et al. Prospective cohort study of female sex workers and the risk of HIV infection in Alicante, Spain (1986-96). Sex Transm Infect. 1998 Aug;74(4):284-8.                                    | Cohort                                                                    | 657 FSW     | FSW that have initially attended the Centro para la Información y Prevención del SIDA and were back then HIV free and have returned to the Center between 1986 and 1996. | Mean age was 27 (IQR: 25 - 33) and range of 15 to 64. | 1986 to 1996                             | Alicante, Spain                                                     | Median of 18 months (IQR: 4 months to 5 years) and ranged from 1 month to 35 years. |

| Region | Reference                                                                                                                                                                                                                                       | Methodology                                                                                    | Sample size                                               | Sample definition                                                                                                                                                                                                                                                   | Sample characteristics                             | Year of data collection             | Location                                 | Duration of sex work                                                                                                                                           |
|--------|-------------------------------------------------------------------------------------------------------------------------------------------------------------------------------------------------------------------------------------------------|------------------------------------------------------------------------------------------------|-----------------------------------------------------------|---------------------------------------------------------------------------------------------------------------------------------------------------------------------------------------------------------------------------------------------------------------------|----------------------------------------------------|-------------------------------------|------------------------------------------|----------------------------------------------------------------------------------------------------------------------------------------------------------------|
| Europe | Ward H, Day S, Mezzone J, Dunlop L, Donegan C, Farrar S, Whitaker L, Harris JR, Miller DL. Prostitution and risk of HIV: female prostitutes in London. BMJ. 1993 Aug 7;307(6900):356-8. PubMed PMID: 8374417; PubMed Central PMCID: PMC1678221. | cross sectional survey.                                                                        | 280 FSW                                                   | They were recruited by referral from health workers in the genitourinary medicine clinic at St Mary's Hospital, referral from friends and colleagues of prostitutes, fieldwork (visiting streets, magistrates' courts, flats, agencies, and saunas), and telephone. | The participants were aged 16-51 (median 25);      | Between April 1989 and August 1991. | London, England.                         | They had been working as prostitutes for between one month and 34 years (median four years)                                                                    |
| Europe | Ward H, Day S. What happens to women who sell sex? Report of a unique occupational cohort. Sex Transm Infect. 2006 Oct;82(5):413-7. Epub 2006 Jun 21. PubMed PMID: 16790559; PubMed Central PMCID: PMC2563855.                                  | A longitudinal study of sex workers recruited between 1986 and 1993 and followed for 15 years. | 130 FSW, of the original 354 women enrolled in the cohort | Women that defined themselves as FSWs and had worked within the past 3 months.                                                                                                                                                                                      | Median of age was 27 (IQR: 23,31 and range: 16-51) | From 1997 to 2000                   | Clinic and community settings in London. | The majority (73/124,59%) were still in the sex industry and had sold sex for a mean of 13.6 years. In months the median was 36 (IQR: 15,72 and range: 1-216). |

| Region | Reference                                                                                                                                                                                                                                                                                               | Methodology            | Sample size | Sample definition                                                                                                      | Sample characteristics                                                                                   | Year of data collection | Location                    | Duration of sex work                                                                                                                         |
|--------|---------------------------------------------------------------------------------------------------------------------------------------------------------------------------------------------------------------------------------------------------------------------------------------------------------|------------------------|-------------|------------------------------------------------------------------------------------------------------------------------|----------------------------------------------------------------------------------------------------------|-------------------------|-----------------------------|----------------------------------------------------------------------------------------------------------------------------------------------|
| Europe | Bratòs MA, Eiros JM, Orduña A, Cuervo M, Ortiz de Lejarazu R, Almaraz A, Martín-Rodríguez JF, Gutiérrez-Rodríguez MP, Orduña Prieto E, Rodríguez-Torres A.. Influence of Syphilis in Hepatitis B Transmission in a Cohort of Female Prostitutes. Sex Transm Dis. 1993 Sep-Oct;20(5):257-61.             | Cross-sectional study. | 368 FSW     | FSW that went to a public health centre for routine medical examination                                                | FSW practiced prostitution in pubs or massage parlors and had no more than 20 sexual contacts per month. | not mentioned           | ?, Spain                    | 32.6% were working for less than 2 years; 30.2% for 2 to 3 years; 18.5% for 4 to 5 years; 10.6% for 6 to 7 years; 8% for more than 7 years.  |
| Europe | Fennema JS, van Ameijden EJ, Coutinho RA, van den Hoek AA. HIV, sexually transmitted diseases and gynecologic disorders in women: increased risk for genital herpes and warts among HIV-infected prostitutes in Amsterdam. AIDS. 1995 Sep;9(9):1071-8.                                                  | Cohort                 | 212 FSWs    | UD free-HIV women who used drugs and who exchanged sex for money, presents or goods were recruited at methadone posts. | Mean age at enrolment was 27+- 4.8.                                                                      | 1985 to 1992            | Amsterdam, The Netherlands. | 45% were working for less than 5 years; 33% for 5 to 10 years; and 22% for more than 10 years.                                               |
| Europe | Orduña A, Bratos MA, Gutierrez P, Almaraz A, Eiros JM, Martín JF, Gonzalez JM, Card-Patón A, Rodríguez-Torres A. Infection by hepatitis B and C virus in non-intravenous drug using female prostitutes in Spain. European Journal of Epidemiology, Volume 8, Number 5, 656-659, DOI: 10.1007/BF00145380 | Cross-sectional        | 227 FSWs    | Non-IDU and that had more than 20 partners per month.                                                                  |                                                                                                          |                         | Spain                       | 38.7% were working for less than 2 years; 31.3% for 2 to 3 years; 12.8% for 4 to 5 years; 9.3% for 6 to 7 years; 7.9% for more than 7 years. |

| Region | Reference                                                                                                                                                                                                                                                         | Methodology     | Sample size | Sample definition                                                                                                                           | Sample characteristics                                                                                                                                                                                                                                | Year of data collection        | Location         | Duration of sex work                                                                                                                                                                                                                   |
|--------|-------------------------------------------------------------------------------------------------------------------------------------------------------------------------------------------------------------------------------------------------------------------|-----------------|-------------|---------------------------------------------------------------------------------------------------------------------------------------------|-------------------------------------------------------------------------------------------------------------------------------------------------------------------------------------------------------------------------------------------------------|--------------------------------|------------------|----------------------------------------------------------------------------------------------------------------------------------------------------------------------------------------------------------------------------------------|
| Europe | Papaevangelou G, Roumeliotou A, Kallinikos G, Papoutsakis G, Trichopoulou E, Stefanou T. Education in Preventing HIV Infection in Greek Registered Prostitutes. J Acquir Immune Defic Syndr. 1988;1(4):386-9.                                                     | Cohort          | 902 FSWs    | They were divided in 3 different cohorts. 350 followed from 1985 to 1986, 270 followed from 1986 to 1987 and 282 followed from 1987 to 1988 | The overall median age was 38.6 years ranging from 18 to 48. The cohort from 1985 was in median 38.4 years old and reported 1140 sex contacts per month. The cohort from 1986 was 37.8 years old (median) and reported 960 sexual contacts per month. | 1985 to 1988                   | Athens, Greece   | Overall, the median was 12 years, ranging from 1 to 30. The cohort started in 1985 reported a median of 13 years and the one started in 1986 showed a median of 8 years of prostitution. No information available for the 1987 cohort. |
| Europe | Pineda JA, Aguado I, Rivero A, Vergara A, Hernández-Quero J, Luque F, Pino R, Abad MA, Santos J, Cruz E, et al. HIV-1 infection among non-intravenous drug user female prostitutes in Spain. No evidence of evolution to Pattern II. AIDS. 1992 Nov;6(11):1365-9. | Cross-sectional | 519 FSWs    | Non-IDU FSWs that attended 4 University Hospitals and that had been working for at least 2 months.                                          | Mean age was 30+-7. Average of 59+-84 different sex partners per month, ranging from 1 to 6000.                                                                                                                                                       | From May 1989 to December 1990 | Andaluzia, Spain | Mean of 50 month +-60, ranging from 2 to 420                                                                                                                                                                                           |



| Region | Reference                                                                                                                                                                                                                                                                                                                                                                                     | Methodology                                                                                                         | Sample size | Sample definition                                                                                            | Sample characteristics                                                                                | Year of data collection  | Location         | Duration of sex work                                                                                                                                                               |
|--------|-----------------------------------------------------------------------------------------------------------------------------------------------------------------------------------------------------------------------------------------------------------------------------------------------------------------------------------------------------------------------------------------------|---------------------------------------------------------------------------------------------------------------------|-------------|--------------------------------------------------------------------------------------------------------------|-------------------------------------------------------------------------------------------------------|--------------------------|------------------|------------------------------------------------------------------------------------------------------------------------------------------------------------------------------------|
| Europe | Pineda JA, Rivero A, Rey C, Hernández-Quero J, Vergara A, Muñoz J, Aguado I, Santos J, Torronteras R, Gallardo JA, <i>et al.</i> Association between hepatitis C virus seroreactivity and HIV infection in non-intravenous drug abusing prostitutes. <i>European Journal of Clinical Microbiology &amp; Infectious Diseases</i> , 1995, Volume 14, Number 5, 460-464, DOI: 10.1007/BF02114907 | Cross-sectional                                                                                                     | 294 FSWs    | Non-IDU, non-transfused FSWs that had been working for at least 21 month and only in brothels or nightclubs. |                                                                                                       | 1990                     | Andaluzia, Spain | Overall, 45% were working for 24 months or less and 55% for more than 24 months. The mean duration among the 17 HCV positive was 58+-58 and among the 277 HCV negative was 50+-53. |
| Europe | Uusküla A, Fischer K, Raudne R, Kilgi H, Krylov R, Salminen M, Brummer-Korvenkontio H, St Lawrence J, Aral S. A study on HIV and hepatitis C virus among commercial sex workers in Tallinn. <i>Sex Transm Infect.</i> 2008 Jun;84(3):189-91. Epub 2008 Feb 6. PubMed PMID: 18256109.                                                                                                          | Cross sectional study using a multistage approach combining time-location, community and respondent driven-sampling | 227 FSWs    | Women that had exchange sex for money, drugs or goods within the past 3 months.                              | Mean age was 29.5 (9.1). Mean number of clients per week was 7, median was 11, ranging from 0 to 100. | October 2005 to May 2006 | Tallim, Estonia  | Mean: 8.3 years, median was 6.2 and range was 0 to 30.                                                                                                                             |
| Europe | Gutierrez P, Orduña A, Bratos MA, Eiros JM, Gonzalez JM, Almaraz A, Caro-Patón A, Rodríguez-Torres A. Prevalence of anti-hepatitis C virus antibodies in positive FTA-ABS non-drug abusing female prostitutes in Spain. <i>Sex Transm Dis.</i> 1992 Jan-Feb;19(1):39-40.                                                                                                                      | Cross-sectional - same database as Orduna                                                                           | 227 FSWs    | Non-IDU and that had more than 20 partners per month.                                                        |                                                                                                       |                          | Spain            | 38.7% were working for less than 2 years; 31.3% for 2 to 3 years; 12.8% for 4 to 5 years; 9.3% for 6 to 7 years; 7.9% for more than 7 years.                                       |

| Region        | Reference                                                                                                                                                                                                                                                                                                                                             | Methodology                                         | Sample size | Sample definition                                                                                                                                                                                                                                                            | Sample characteristics                                                        | Year of data collection | Location                                      | Duration of sex work                                 |
|---------------|-------------------------------------------------------------------------------------------------------------------------------------------------------------------------------------------------------------------------------------------------------------------------------------------------------------------------------------------------------|-----------------------------------------------------|-------------|------------------------------------------------------------------------------------------------------------------------------------------------------------------------------------------------------------------------------------------------------------------------------|-------------------------------------------------------------------------------|-------------------------|-----------------------------------------------|------------------------------------------------------|
| Europe        | McKeganey N, Barnard M. Selling sex: female street prostitution and HIV risk behaviour in Glasgow. <i>AIDS Care</i> . 1992;4(4):395-407. PubMed PMID: 1493147.                                                                                                                                                                                        | Cross-sectional study using time-sampling technique | 68 FSWs     | Street-based FSWs in the main red light area                                                                                                                                                                                                                                 | Median of age was 24, ranging from 16 to 51. Average of 7.1 clients per week. | 1991                    | Glasgow, Scotland                             | Median of 2 years, ranging from 2 weeks to 30 years. |
| Latin America | Loza O, Patterson TL, Rusch M, Martínez GA, Lozada R, Staines-Orozco H, Magis-Rodríguez C, Strathdee SA; Proyecto Mujer Segura. Drug-related behaviors independently associated with syphilis infection among female sex workers in two Mexico-US border cities. <i>Addiction</i> . 2010 Aug;105(8):1448-56. Epub 2010 Apr 27. PubMed PMID: 20456292. | Cross sectional behavioral intervention study       | 914 FSW     | Participants were women, at least 18 years old, without known HIV infection, who self-identified as a FSW (i.e. traded sex for drugs, money or other material benefit), and reported unprotected vaginal or anal sex with a client at least once during the previous 4 weeks | Median age was 32 (IQR: 26 - 39) and age entered at sex work, 26              | 2004 to 2006            | Tijuana (n = 474) and Ciudad Juarez (n = 450) | Median duration of sex work was 4 years (IQR:2 -10)  |

| Region        | Reference                                                                                                                                                                                                                                                                                                                            | Methodology                                                     | Sample size                            | Sample definition                                                                                                                                                                                                                                                                                                                                                                     | Sample characteristics                 | Year of data collection             | Location                       | Duration of sex work                                          |
|---------------|--------------------------------------------------------------------------------------------------------------------------------------------------------------------------------------------------------------------------------------------------------------------------------------------------------------------------------------|-----------------------------------------------------------------|----------------------------------------|---------------------------------------------------------------------------------------------------------------------------------------------------------------------------------------------------------------------------------------------------------------------------------------------------------------------------------------------------------------------------------------|----------------------------------------|-------------------------------------|--------------------------------|---------------------------------------------------------------|
| Latin America | Strathdee SA, Lozada R, Semple SJ, Orozovich P, Pu M, Staines-Orozco H, Fraga-Vallejo M, Amaro H, Delatorre A, Magis-Rodríguez C, Patterson TL. Characteristics of female sex workers with US clients in two Mexico-US border cities. Sex Transm Dis. 2008 Mar;35(3):263-8. PubMed PMID: 18032996; PubMed Central PMCID: PMC2737364. | Behavioral intervention study that aimed to increase condom use | Same results and database of Loza 2010 | at least 18 years of age, providing informed consent, and having traded sex for drugs, money, or other material benefit within the previous 2 months. Since this was an intervention study, women were also required to have had unprotected vaginal sex with at least 1 client in the past 2 months, and were excluded if they reported that they had previously tested HIV positive | Same results and database of Loza 2010 | Between January 2004 and March 2005 | Tijuana and Cd. Juarez, Mexico | The median number of years spent as a sex worker was 4 years. |

| Region        | Reference                                                                                                                                                                                                                                                                                                                                                                      | Methodology                                                     | Sample size                            | Sample definition                                                                                                                                                                                                                                                                                                                                                                                                             | Sample characteristics                 | Year of data collection             | Location                       | Duration of sex work                                          |
|---------------|--------------------------------------------------------------------------------------------------------------------------------------------------------------------------------------------------------------------------------------------------------------------------------------------------------------------------------------------------------------------------------|-----------------------------------------------------------------|----------------------------------------|-------------------------------------------------------------------------------------------------------------------------------------------------------------------------------------------------------------------------------------------------------------------------------------------------------------------------------------------------------------------------------------------------------------------------------|----------------------------------------|-------------------------------------|--------------------------------|---------------------------------------------------------------|
| Latin America | Strathdee SA, Philbin MM, Semple SJ, Pu M, Orozovich P, Martinez G, Lozada R, Fraga M, de la Torre A, Staines H, Magis-Rodríguez C, Patterson TL. Correlates of injection drug use among female sex workers in two Mexico-U.S. border cities. <i>Drug Alcohol Depend.</i> 2008 Jan 1;92(1-3):132-40. Epub 2007 Aug 21. PubMed PMID: 17714888; PubMed Central PMCID: PMC2213538 | Behavioral intervention study that aimed to increase condom use | Same results and database of Loza 2010 | Eligibility requirements included being at least 18 years of age, providing informed consent, and having traded sex for drugs, money, or other material benefit within the previous 2 months. Since this was an intervention study, women were also required to have had unprotected vaginal sex with at least 1 client in the past 2 months, and were excluded if they reported that they had previously tested HIV positive | Same results and database of Loza 2010 | Between January 2004 and March 2005 | Tijuana and Cd. Juarez, Mexico | The median number of years spent as a sex worker was 4 years. |

| Region        | Reference                                                                                                                                                                                                                                                                                                     | Methodology            | Sample size | Sample definition                                                                                           | Sample characteristics                                                                                                                                                                                     | Year of data collection        | Location            | Duration of sex work                                                                            |
|---------------|---------------------------------------------------------------------------------------------------------------------------------------------------------------------------------------------------------------------------------------------------------------------------------------------------------------|------------------------|-------------|-------------------------------------------------------------------------------------------------------------|------------------------------------------------------------------------------------------------------------------------------------------------------------------------------------------------------------|--------------------------------|---------------------|-------------------------------------------------------------------------------------------------|
| Latin America | Bucardo J, Semple SJ, Fraga-Vallejo M, Davila W, Pson TL. A qualitative exploration of female sex work. Tijuana, Mexico. ArchSexBehav 2004; 33:343–51. Lowndes CM, Alary M, Platt L. Injection drug use, commercial sex work, and the HIV/STI epidemic in the Russian Federation. SexTransmDis 2003; 30:46–8. | Qualitative interviews | 25 FSW      | FSWs who were recruited through the women's clinic operated by Fronteras Unidas Pro Salud, Asociacion Civil | Participants ranged in age from 20 to 40 years, with a mean age of 27.9 years. The majority of the women reported working 6 or 7 days a week. The average number of clients per day was 6.0 (range, 1–10). | Not mentioned.                 | Tijuana, Mexico     | Participants had been performing sex work for an average of 5 years (range, 3 months–14 years). |
| Latin America | SZWARCWALD, C. L. Taxas de prevalência de HIV e sífilis e conhecimento, atitudes e práticas de risco relacionadas às infecções sexualmente transmissíveis no grupo das mulheres profissionais do sexo, no Brasil. Study funded by the STD, Aids and Viral Hepatitis Department.                               | RDS                    | 2500        |                                                                                                             |                                                                                                                                                                                                            | 2009                           | 10 Brazilian cities | Mean of 8.6 years (SD:0.18) and median of 5.72 years.                                           |
| Latin America | Trevisol FS, Silva MV. HIV Frequency Among Female Sex Workers in Imbituba, Santa Catarina, Brazil. BJID 2005; 9 (December)                                                                                                                                                                                    | Cross-sectional study  | 84 FSW      | More than 18 years old                                                                                      | Mean age was 27 (SD 5.2) ranging from 18 to 60.                                                                                                                                                            | December 2003 to February 2004 | Imbituba, Brazil    | 47.6 % were working for 2.5 years or less and the rest for more than 2.5 years.                 |

| Region        | Reference                                                                                                                                                                                                                                                                      | Methodology     | Sample size | Sample definition                                                      | Sample characteristics                                                                                       | Year of data collection         | Location                 | Duration of sex work                                                                                                    |
|---------------|--------------------------------------------------------------------------------------------------------------------------------------------------------------------------------------------------------------------------------------------------------------------------------|-----------------|-------------|------------------------------------------------------------------------|--------------------------------------------------------------------------------------------------------------|---------------------------------|--------------------------|-------------------------------------------------------------------------------------------------------------------------|
| Latin America | Hyams KC, Phillips IA, Tejada A, Wignall FS, Roberts CR, Escamilla J. Three-Year Incidence Study of Retroviral and Viral Hepatitis Transmission in a Peruvian Prostitute Population. <i>J Acquir Immune Defic Syndr.</i> 1993 Dec;6(12):1353-7.                                | Cohort          | 966 FSWs    | FSWs registered at a public health clinic in Callao, port city of Lima | Mean of age at enrolment: 32.2, ranging 18 to 65. Mean of 164 sexual contacts in the previous month.         | 1987 to 1990                    | Callao, Peru             | The mean duration of sex work at enrolment was 6.2 years, median of 5 years, ranging from less than a year to 30 years. |
| Latin America | Sánchez J, Gotuzzo E, Escamilla J, Carrillo C, Moreyra L, Stamm W, Ashley R, Swenson P, Holmes KK. Sexually Transmitted Infections in Female Sex Workers: Reduced by Condom Use But Not by a Limited Periodic Examination Program. <i>Sex Transm Dis.</i> 1998 Feb;25(2):82-9. | Cross-sectional | 400 FSWs    | Attending Centro antivenereo de Lima                                   |                                                                                                              | From October 1991 to April 1992 | Lima, Peru               | The mean was 41.7 months +- 48.3, ranging from 1 to 264.                                                                |
| Latin America | Wignall FS, Hyams KC, Phillips IA, Escamilla J, Tejada A, Li O, Lopez F, Chauca G, Sanchez S, Roberts CR. Sexual transmission of human T-lymphotropic virus type I in Peruvian prostitutes. <i>J Med Virol.</i> 1992 Sep;38(1):44-8.                                           | Cross-sectional | 467 FSWs    | 395 FSWs from Calao and 72 from Iquitos. Attended a public SDT clinic. | Mean of age: 33.8+-8.2, ranging from 18 to 60. Mean number of sexual contacts in the previous month was 205. | July 1987 to May 1988           | Iquitos and Callao, Peru | Mean of 8.8 years +- 6.7, ranging from 1 year to 39 years.                                                              |

| Region        | Reference                                                                                                                                                                                                                                                                                        | Methodology                                     | Sample size | Sample definition                                                                                        | Sample characteristics                                     | Year of data collection    | Location              | Duration of sex work                                                                                        |
|---------------|--------------------------------------------------------------------------------------------------------------------------------------------------------------------------------------------------------------------------------------------------------------------------------------------------|-------------------------------------------------|-------------|----------------------------------------------------------------------------------------------------------|------------------------------------------------------------|----------------------------|-----------------------|-------------------------------------------------------------------------------------------------------------|
| Latin America | Gotuzzo E, Sánchez J, Escamilla J, Carrillo C, Phillips IA, Moreyra L, Stamm W, Ashley R, Roggen EL, Kreiss J, et al. Human T cell lymphotropic virus type I infection among female sex workers in Peru. J Infect Dis. 1994 Apr;169(4):754-9. PubMed PMID: 8133088.                              | Cross-sectional                                 | 396 FSWs    | Women who attended Centro Antivenereo of Lima. 284 registered for follow up and the rest not registered. | Mean age of 28.8+- 6.4, ranging from 18 to 48.             | October 1991 to April 1992 | Lima, Peru            | 56.8% were sex workers for more less than 3 years; 27.3% for 3 to 6 years; and 15.9% for more than 6 years. |
| Latin America | Paris M, Gotuzzo E, Goyzueta G, Aramburu J, Caceres CF, Castellano T, Jordan NN, Vermund SH, Hook EW 3rd. Prevalence of gonococcal and chlamydial infections in commercial sex workers in a Peruvian Amazon city. Sex Transm Dis. 1999 Feb;26(2):103-7. PubMed PMID: 10029985. 560: Klausner JD, | Cross-sectional study, using convenience sample | 100 FSW     | Street and brothel commercial sex workers                                                                | The mean age of participants was 30.3 (range 15-57) years. | Not mentioned              | Loreto Province, Peru | 72% were sex workers for 5 years or less.                                                                   |

| Region        | Reference                                                                                                                                                                                                      | Methodology                                                | Sample size                 | Sample definition                                                                                                  | Sample characteristics                                                                                   | Year of data collection             | Location                             | Duration of sex work                                                                                   |
|---------------|----------------------------------------------------------------------------------------------------------------------------------------------------------------------------------------------------------------|------------------------------------------------------------|-----------------------------|--------------------------------------------------------------------------------------------------------------------|----------------------------------------------------------------------------------------------------------|-------------------------------------|--------------------------------------|--------------------------------------------------------------------------------------------------------|
| North America | Potterat JJ, Woodhouse DE, Muth JB, Muth SQ. Estimating the prevalence and career longevity of prostitute women The Journal of Sex Research Vol. 27, No. 2 (May, 1990), pp. 233-243                            | Cohort - continuous surveillance of prostitute population. | 361 long-term residents FSW | Women who exchange sexual activity for payment. Women known by a health department to have engaged in prostitution | Mean age at first visit was 22.7 (SD: 4.66) and median of 22.                                            | 1970 to 1988                        | Colorado Springs, USA                | Mean of 5 years and median of 4. The measure was the interval between the first and last clinic visit. |
| North America | Seidlin M, Krasinski K, Bebenroth D, Itri V, Paolino AM, Valentine F. Prevalence of HIV infection in New York call girls. J Acquir Immune Defic Syndr. 1988;1(2):150-4. PubMed PMID: 3216302.                  | Cross sectional study.                                     | 78 FSW                      | Women that have been performing sexual services for money but had never solicited clients on the streets.          | Mean age was 31.6 (range 18 to 58). 83% were caucasian.                                                  | From January 1986 to December 1987. | New York, USA                        | 5.1 years (range: 0.4 to 18 years)                                                                     |
| North America | Casabona J, Sánchez E, Salinas R, Lacasa C, Verani P. Seroprevalence and risk factors for HIV transmission among female prostitutes: A community survey. European Journal of Epidemiology. 1990; 6(3); 248-52. | Community survey                                           | 71 FSWs.                    |                                                                                                                    | Mean age: 29 +- 7.42. Mean age of initiation: 23.41+- 5.84. Mean number of clients per week: 27+- 15.72. | Not mentioned                       | 3 cities in Southern California, USA | The mean duration of prostitution was 77.05 months +- 66.26 and the media was 61.33.                   |



| Region | Reference                        | Methodology | Sample size | Sample definition | Sample characteristics                                                                               | Year of data collection        | Location                                                                                       | Duration of sex work                                                       |
|--------|----------------------------------|-------------|-------------|-------------------|------------------------------------------------------------------------------------------------------|--------------------------------|------------------------------------------------------------------------------------------------|----------------------------------------------------------------------------|
| Asia   | Cambodia Ministry of Health 1997 | BSS         | 245 DFSW    | Brothel based     | Mean age was 21.9 years. Mean of 3.5 clients and of 3.6 sexual acts on the last day.                 | 1997                           | In 2 provinces of Cambodia: Phnom Penh and Siem Reap                                           | Mean time of sex work was 1.4 years and median less than a year.           |
| Asia   | Cambodia Ministry of Health 1998 | BSS         | 804 DFSWs   | Brothel based     | Mean age was 21.5 years. Mean number of clients on the last day was 3.0 and median 2.0.              | 1998                           | In 5 provinces of Cambodia: Phnom Penh, Kampong Cham, Battambang, Siem Reap and Sihanouk Ville | Mean time of sex work was 1.0 years and median less than a year.           |
| Asia   | Cambodia Ministry of Health 1999 | BSS         | 792 DFSWs   | Brothel based     | Mean age was 21.6 years. Mean number of clients on the last day was 2.5 and median 2.0.              | 1999                           | In 5 provinces of Cambodia: Phnom Penh, Kampong Cham, Battambang, Siem Reap and Sihanouk Ville | Mean time of sex work was 1.2 years and median less than a year.           |
| Asia   | Cambodia Ministry of Health 2001 | BSS         | 570 DFSWs   | Brothel-based     | Mean age of 22.3 years. Median of 2 clients on the last day and mean of 3.1 clients on the last day. | December 2001 and January 2002 | In 5 provinces of Cambodia: Phnom Penh, Kampong Cham, Battambang, Siem Reap and Sihanouk Ville | The median number of months working at a brothel was 112 and the mean 9.1. |

| Region | Reference                        | Methodology | Sample size | Sample definition         | Sample characteristics                                                                                                                                                                                                                                                                                                                                                                                 | Year of data collection | Location                                                                                                                                   | Duration of sex work                                                                                                                                                                                |
|--------|----------------------------------|-------------|-------------|---------------------------|--------------------------------------------------------------------------------------------------------------------------------------------------------------------------------------------------------------------------------------------------------------------------------------------------------------------------------------------------------------------------------------------------------|-------------------------|--------------------------------------------------------------------------------------------------------------------------------------------|-----------------------------------------------------------------------------------------------------------------------------------------------------------------------------------------------------|
| Asia   | Cambodia Ministry of Health 2003 | BSS         | 1308 DFSWs  | Brothel based sex workers | The DFSWs were 15 to 45 years old, and their mean age was 23.3 years (median=22). DFSW reported up to 25 clients in the last working day, but 22% had no client and 18% had 5 clients or more. All together their mean number of clients in the past day was 2.6 (median=2). The mean number of sexual intercourse in the last working day was comparable to the number of clients in the same period. | 2003                    | In 10 cities in Cambodia: Phnom Penh, Battambang, Siem Reap, Sihanoukville, and Kampong Cham, Pursat, Koh Kong, Kratie, Takeo, and Kampot. | 50% of the DFSWs sold sex for the first time during the past year, while for 19% first paid sex occurred 5 to 20 years ago. The mean duration of selling sex, 21.3 months and the median 12 months. |

| Region | Reference                        | Methodology | Sample size | Sample definition                                                                                                   | Sample characteristics                                                                                                                                                                              | Year of data collection | Location                                                                                                                                   | Duration of sex work                                                                                                                                                                                                                                                                                    |
|--------|----------------------------------|-------------|-------------|---------------------------------------------------------------------------------------------------------------------|-----------------------------------------------------------------------------------------------------------------------------------------------------------------------------------------------------|-------------------------|--------------------------------------------------------------------------------------------------------------------------------------------|---------------------------------------------------------------------------------------------------------------------------------------------------------------------------------------------------------------------------------------------------------------------------------------------------------|
| Asia   | Cambodia Ministry of Health 2003 | BSS         | 1252 IFSWs  | 600 beer promoters and 474 karaoke workers                                                                          | Beer promoters were older than karaoke workers (mean age 25 versus 22)                                                                                                                              | 2003                    | In 10 cities in Cambodia: Phnom Penh, Battambang, Siem Reap, Sihanoukville, and Kampong Cham, Pursat, Koh Kong, Kratie, Takeo, and Kampot. | Karaoke workers reported having been in their current job for a shorter period than beer promoters (mean of 7.1 versus 14.1 months, and median of 4 versus 6 months, respectively), suggesting a higher turnover among karaoke workers. With a median number of months in the current job below 1 year. |
| Asia   | Cambodia Ministry of Health 2007 | BSS         | 592 DFSWs   | Women, aged at least 15 years old, brothel-based and currently employed and present at the moment of the interview. | They had a mean age of 25.2 years. The mean number of clients in the last working day was 4.4. The majority of DFSWs had 2 to 5 clients in the previous day and about 80 clients in the past month. | 2007                    | In 5 provinces of Cambodia: Phnom Penh, Kampong Cham, Battambang, Siem Reap and Sihanouk Ville                                             | The median number of months in their current job was 12                                                                                                                                                                                                                                                 |

| Region | Reference                                                                                                                                                                                                                                    | Methodology              | Sample size | Sample definition                                                                                                                                                                       | Sample characteristics                                                                                                                                                                                                                       | Year of data collection | Location                                                                                       | Duration of sex work                                                                                                                                                                    |
|--------|----------------------------------------------------------------------------------------------------------------------------------------------------------------------------------------------------------------------------------------------|--------------------------|-------------|-----------------------------------------------------------------------------------------------------------------------------------------------------------------------------------------|----------------------------------------------------------------------------------------------------------------------------------------------------------------------------------------------------------------------------------------------|-------------------------|------------------------------------------------------------------------------------------------|-----------------------------------------------------------------------------------------------------------------------------------------------------------------------------------------|
| Asia   | Cambodia Ministry of Health 2007                                                                                                                                                                                                             | BSS                      | 1093 IDFSWs | 395 beer promoters, 399 karaoke workers and 299 beer garden staff, Women, aged at least 15 years old, brothels-based and currently employed and present at the moment of the interview. | The beer promoters were the oldest with a mean age of 25.5 years (median 25 years), Karaoke workers and beer garden workers were similar of similar age with means of 22.9 years and 21.8 years respectively (median 22 years and 21 years). | 2007                    | In 5 provinces of Cambodia: Phnom Penh, Kampong Cham, Battambang, Siem Reap and Sihanouk Ville | The median number of months in their current establishment was 5 for beer garden workers, 12 for beer promoters and 6 for karaoke workers.                                              |
| Asia   | Celentano DD, Akarasewi P, Sussman L, Suprasert S, Matanasarawoot A, Wright NH, Theetranont C, Nelson KE. HIV-1 infection among lower class commercial sex workers in Chiang Mai, Thailand. AIDS. 1994 Apr;8(4):533-7. PubMed PMID: 8011259. | A cross-sectional study. | 273 FSW     | FSW that worked in 7 brothels, 2 restaurants, a bar and a motel.                                                                                                                        | 54% were 21 years old or older.                                                                                                                                                                                                              | May and June 1992       | Chiang Mai, Thailand                                                                           | 29.7% were sex workers for 1 to 12 months; 23.1% for 13 to 24 months; 24.9% for 25 to 48 months; and 22.3% for 49 to 192 months. The mean duration of employment was less than 3 years. |

| Region | Reference                                                                                                                                                                                                                           | Methodology               | Sample size | Sample definition                                                                                                                                                                                                                                            | Sample characteristics                          | Year of data collection         | Location                               | Duration of sex work                                                                                                       |
|--------|-------------------------------------------------------------------------------------------------------------------------------------------------------------------------------------------------------------------------------------|---------------------------|-------------|--------------------------------------------------------------------------------------------------------------------------------------------------------------------------------------------------------------------------------------------------------------|-------------------------------------------------|---------------------------------|----------------------------------------|----------------------------------------------------------------------------------------------------------------------------|
| Asia   | Gu J, Lau JT, Chen X, et al. Using the Theory of Planned Behavior to investigate condom use behaviors among female injecting drug users who are also sex workers in China. AIDS Care. 2009 Aug;21(8):967-75. PubMed PMID: 20024752. | Snowball sampling process | 216 IDUFSWs | Non-institutionalised female IDUs, who were of age 18 years old or above, and whom mainly used heroin for injection and had engaged in sex work (trade sex for money or drugs) in the past 6 months,                                                         | The participants were on average 26.1 years old | August 2005 through April, 2006 | Whilst Dazhou, Sichuan Province, China | About half (50.5%) of the respondents had involved in commercial sex work for 3 years or more.                             |
| Asia   | Kao JH, Chen W, Chen PJet al. GB virus-C/hepatitis G virus infection in prostitutes: possible role of sexual transmission. J Med Virol. 1997 Aug;52(4):381-4. PubMed PMID: 9260684.                                                 | Cross-sectional study     | 145 FSW     | HIV negative licensed female sex workers who received mandatory routine health check-ups in the Municipal Venereal Disease Control Institute. They were asymptomatic for liver disease on enrollment, and none admitted a history of intravenous drug abuse. | Mean age, 35 ± 10 years; range, 20–65 years.    | Not mentioned                   | Taiwan                                 | Mean of duration of sex work was 6.5±3.6 years among anti-HCV-positive prostitutes and 4.5±2.8years for the seronegatives. |

| Region | Reference                                                                                                                                                                                                                                              | Methodology       | Sample size                                                                       | Sample definition                                                                                                                                                           | Sample characteristics               | Year of data collection          | Location                     | Duration of sex work                                                                           |
|--------|--------------------------------------------------------------------------------------------------------------------------------------------------------------------------------------------------------------------------------------------------------|-------------------|-----------------------------------------------------------------------------------|-----------------------------------------------------------------------------------------------------------------------------------------------------------------------------|--------------------------------------|----------------------------------|------------------------------|------------------------------------------------------------------------------------------------|
| Asia   | Lau JT, Zhang J, Zhang L, Wang N, Cheng F, Zhang Y, Gu J, Tsui HY, Lan Y. Comparing prevalence of condom use among 15,379 female sex workers injecting or not injecting drugs in China. Sex Transm Dis. 2007 Nov;34(11):908-16. PubMed PMID: 18049424. | BSS               | 15379 FSW were interviewed and 15277 provided information on duration of sex work |                                                                                                                                                                             | 26% were 20 years old or less        | 2002 to 2004                     | Sichuan, China               | < 1 year: 4437 (29%), 1 year: 4929 (32.3%), 2 to 3 years: 4065 (26.6%), >=4 years:1846 (12.1%) |
| Asia   | Majid N, Bollen L, Morineau G, Daily SF, Mustikawati DE, Agus N, Anartati AS, Natpratan C, Magnani R. Syphilis among female sex workers in Indonesia: need and opportunity for intervention. Sex Transm Infect. 2010 Jun 3. .                          | behaviouralsurvey | A total of 4324 FSW, 2436 direct and 1888 indirect.                               | Direct (ie, brothel-based and street-based FSWs) and indirect (ie, women working in entertainment places such as massage parlors, karaoke clubs, discotheques and bars) FSW | Median age was 27 y (range (15 - 59) | From August through October 2007 | 10 major cities in Indonesia | Median of 18 months (range: 1- 328).                                                           |

| Region | Reference                                                                                                                                                                                                                                                | Methodology                                                            | Sample size                                                                                                        | Sample definition                                                        | Sample characteristics                                                                                                                                                                                                | Year of data collection    | Location                        | Duration of sex work                                                           |
|--------|----------------------------------------------------------------------------------------------------------------------------------------------------------------------------------------------------------------------------------------------------------|------------------------------------------------------------------------|--------------------------------------------------------------------------------------------------------------------|--------------------------------------------------------------------------|-----------------------------------------------------------------------------------------------------------------------------------------------------------------------------------------------------------------------|----------------------------|---------------------------------|--------------------------------------------------------------------------------|
| Asia   | Mishra S, Moses S, Hanumaiah PK, et al. Sex work, Syphilis, and Seeking Treatment: An Opportunity for Intervention in HIV Prevention Programming in Karnataka, South India. Sex Transm Dis. 2009 Feb 9. [Epub ahead of print] PubMed PMID: 19174734.     | Cross-sectional IBBA surveys of urban FSWs in 5 districts of Karnataka | 2208 FSW                                                                                                           |                                                                          | 54.8% were 30 years of age or more.                                                                                                                                                                                   | 2004 to 2006               | 5 districts of Karnataka, India | 61.3% of the FSWs reported duration of sex work >=3 years                      |
| Asia   | Nhurod P, Bollen LJ, Smutraprapoot P, et al. Access to HIV testing for sex workers in Bangkok, Thailand: a high prevalence of HIV among street-based sex workers. Southeast Asian J Trop Med Public Health. 2010 Jan;41(1):153-62. PubMed PMID: 20578494 | Cross sectional study                                                  | The total sample of the study was 603 women, but only 355 were FSW. 83 street based FSW and 236 other sex workers. | FSW attending three public sexually transmitted infection (STI) clinics. | Median of age was 36 (IQR: 27 - 48) for street based FSW and 26 (IQR: 21 - 33) for other sex workers. The median of age of initiation was 26 (range: 11-57) for street based FSW and 24 (range: 13-50) for other FSW. | From May 2004 to June 2006 | Bangkok, Thailand               | Median of 5 (range: 0-30) for street based FSW and 0 (range: 0-20) for others. |

| Region | Reference                                                                                                                                                                                                                                       | Methodology                                                            | Sample size                         | Sample definition                                                                        | Sample characteristics                                                                              | Year of data collection            | Location                         | Duration of sex work                                                                                               |
|--------|-------------------------------------------------------------------------------------------------------------------------------------------------------------------------------------------------------------------------------------------------|------------------------------------------------------------------------|-------------------------------------|------------------------------------------------------------------------------------------|-----------------------------------------------------------------------------------------------------|------------------------------------|----------------------------------|--------------------------------------------------------------------------------------------------------------------|
| Asia   | Ohshige K, Morio S, Mizushima S, et al. Cross-sectional study on risk factors of HIV among female commercial sex workers in Cambodia. <i>Epidemiol Infect.</i> 2000 Feb;124(1):143-52. PubMed PMID: 10722142; PubMed Central PMCID: PMC2810895. | A cross-sectional study on sexual behaviour and serological prevalence | 202 FSW                             | Brothel based FSWs.                                                                      | The mean age of the 202 CSWs was 20±3 years old (standard deviation: 3±0, youngest: 15, oldest: 33) | Not mentioned                      | Sisophon and Poi Pet in Cambodia | 61.9% were in sex work for less than a year; 23.8% from a year to less than 2 years; and 14.4 for 2 or more years. |
| Asia   | Ohshige K, Morio S, Mizushima S, et al. Behavioural and serological human immunodeficiency virus risk factors among female commercial sex workers in Cambodia. <i>Int J Epidemiol.</i> 2000 Apr;29(2):344-54. PubMed PMID: 10817135.            | Cross-sectional study                                                  | 143 direct CSW and 94 indirect CSW. | DCSW from 20 brothels in Sisophon. IDCWS employed in hotels, nightclubs and restaurants. | The mean ages of DCSW and ICSW were 20.3 (SD: 3.1) and 22 years old (SD: 5.4).                      | From December 1997 to January 1998 | Sisophon, Cambodia               | 62.2% of DCSW reported less than a year of sex work. This number is 30.9% for IDCWS. (49.7% for all of them)       |



| Region | Reference                                                                                                                                                                                                                                                          | Methodology                                                       | Sample size                           | Sample definition                                                                                                                                                                                                                | Sample characteristics                                                                                          | Year of data collection            | Location                              | Duration of sex work                                                                                                                                                                                             |
|--------|--------------------------------------------------------------------------------------------------------------------------------------------------------------------------------------------------------------------------------------------------------------------|-------------------------------------------------------------------|---------------------------------------|----------------------------------------------------------------------------------------------------------------------------------------------------------------------------------------------------------------------------------|-----------------------------------------------------------------------------------------------------------------|------------------------------------|---------------------------------------|------------------------------------------------------------------------------------------------------------------------------------------------------------------------------------------------------------------|
| Asia   | Reza-Paul S, Beattie T, Syed HU, Venukumar KT, et al. Declines in risk behaviour and sexually transmitted infection prevalence following a community-led HIV preventive intervention among female sex workers in Mysore, India. AIDS. 2008 Dec;22 Suppl 5:S91-100. | IBBA with a variation of the time-location cluster (TLC) sampling | 429 FSW, in 2004 and 425 FSW in 2006. |                                                                                                                                                                                                                                  | Both groups with median age 30 years old. The median age women started selling sex was 25 years in both surveys | 2004 and 2006                      | Mysore, India                         | women reported working as sex workers for a median of 3 years at baseline (range 0–38; IQR 1, 5), and 5 years at follow-up (range 0–30; IQR 2, 10). For both surveys the median duration in sex work was 4 years |
| Asia   | Ruan Y, Cao X, Qian HZ, et al Syphilis among female sex workers in southwestern China: potential for HIV transmission. Sex Transm Dis. 2006 Dec;33(12):719-23.                                                                                                     | Cross-sectional study                                             | 343 FSW                               | 1)female;2) self-report of commercial sex in the past 6 months; 3)will stay in Xichang for the next 12 months; 4)able and willing to provide informed consent; 5) able and willing to provide contact information for follow-up. | The median age of initiating sex work was 21 years, ranging from 15 to 34 years.                                | From December 2004 to January 2005 | Xichang City, Sichuan Province, China | The median duration of sex work was 1 year.                                                                                                                                                                      |

| Region | Reference                                                                                                                                                                                            | Methodology                             | Sample size | Sample definition                                           | Sample characteristics                                                                                                                                                                                         | Year of data collection                        | Location                                  | Duration of sex work                                                                                                                           |
|--------|------------------------------------------------------------------------------------------------------------------------------------------------------------------------------------------------------|-----------------------------------------|-------------|-------------------------------------------------------------|----------------------------------------------------------------------------------------------------------------------------------------------------------------------------------------------------------------|------------------------------------------------|-------------------------------------------|------------------------------------------------------------------------------------------------------------------------------------------------|
| Asia   | Rugpao S, Pruithithada N, Yutabootr Y, et al. Condom breakage during commercial sex in Chiang Mai, Thailand. Contraception. 1993 Dec;48(6):537-47. PubMed PMID: 8131395.                             | A cross-sectional study.                | 326 FSW     | Brothel based FSWs. Only brothels that had more than 5 FSW. | The mean age of 326 prostitutes interviewed was 20.6 t 3.2 years. Average clients per day reported in the past 24 hours and in the past 3 months were consistent, i.e., 4.4 t 2.5 and 5.5 2 2.2, respectively. | From August to October 1992.                   | Muang District, Chiang Mai city, Thailand | Duration of prostitution ranged from 10 days to approximately 14 years (median = 13 months).                                                   |
| Asia   | Sarkar K, Bal B, Mukherjee R, et al. Young age is a risk factor for HIV among female sex workers--an experience from India. J Infect. 2006 Oct;53(4):255-9. Epub 2005 Dec 27. PubMed PMID: 16386307. | A cross-sectional community-based study | 2076 FSW    | Brothel-based sex workers                                   | Most subjects were in the 31 to 40 year age group (56.8%), followed by the 21 to 30-year group (28.7%).                                                                                                        | Not mentioned, but paper was published in 2006 | West Bengal, eastern India                | Occupational duration varied from less than 1 year(18%) to more than 5 years (49%). 388 (70.6%) reported been on sex work for 3 years or more. |

| Region | Reference                                                                                                                                                                                                                                     | Methodology                           | Sample size | Sample definition                                          | Sample characteristics                                                          | Year of data collection                                                     | Location                                                                           | Duration of sex work                                                                                           |
|--------|-----------------------------------------------------------------------------------------------------------------------------------------------------------------------------------------------------------------------------------------------|---------------------------------------|-------------|------------------------------------------------------------|---------------------------------------------------------------------------------|-----------------------------------------------------------------------------|------------------------------------------------------------------------------------|----------------------------------------------------------------------------------------------------------------|
| Asia   | Sarkar K, Bhattacharya S, Bhattacharyya S, et al. Oncogenic human papilloma virus and cervical pre-cancerous lesions in brothel-based sex workers in India. J Infect Public Health. 2008;1(2):121-8. Epub 2008 Nov 12. PubMed PMID: 20701853. | Community-based cross-sectional study | 229 FSW     | Brothel-based sex workers                                  | The mean age of sex workers was 30. 118 FSW were <= 20 years old at initiation. | Does not mention the year of data collection. But it was published in 2008. | 3 district brothels (Kolkata, North 24-Parganas and Burdwan) of West Bengal, India | 38 FSW have been working for 0 to 1 year; 85 for 2 to 5 years, 45 for 6 to 10 years and 58 for 11 to 40 years. |
| Asia   | Sawayama Y, Hayashi J, Etoh Y, Urabe H, Minami K, Kashiwagi S. Heterosexual Transmission of GB Virus C/Hepatitis G Virus Infection to Non-Intravenous Drug-Using Female Prostitutes in Fukuoka, Japan. Dig Dis Sci. 1999 Oct;44(10):1937-43.  | Cross-sectional survey                | 134 FSW     | Non- UDI FSW who attended 2 dermatology clinics in Fukuoka | Mean age was 27.2, SD 5.9 and range: 17 to 47.                                  | January 1993 to June 1996.                                                  | Fukuoka, Japan                                                                     | 37.3% were sex workers for less than 2 years; 47% for 2 to 4 years and 27.7% for 5 or more years.              |

| Region | Reference                                                                                                                                                                                                                                  | Methodology                                                                                                                                                                                                                 | Sample size | Sample definition                                                                                                               | Sample characteristics                                                        | Year of data collection                | Location         | Duration of sex work                                                                                                                                                                       |
|--------|--------------------------------------------------------------------------------------------------------------------------------------------------------------------------------------------------------------------------------------------|-----------------------------------------------------------------------------------------------------------------------------------------------------------------------------------------------------------------------------|-------------|---------------------------------------------------------------------------------------------------------------------------------|-------------------------------------------------------------------------------|----------------------------------------|------------------|--------------------------------------------------------------------------------------------------------------------------------------------------------------------------------------------|
| Asia   | Silverman JG, Decker MR, Gupta J, Maheshwari A, Patel V, Raj A. HIV prevalence and predictors among rescued sex-trafficked women and girls in Mumbai, India. J Acquir Immune Defic Syndr. 2006 Dec 15;43(5):588-93. PubMed PMID: 17019369. | Case records and medical documentation of residents at a major nongovernmental organization (NGO) providing rescue, shelter, and care of minor girls and women held against their will in brothels in Mumbai were reviewed. | 175         | Girls and women trafficked into sex work and that had HIV laboratory test results.                                              | Age at trafficking ranged from 8 to 29 years (mean = 16.8 years)              | Between December 2002 and July 2005    | Mumbai, India    | The mean time served in brothels at rescue was 15.8 months, with more than two thirds (69.3%) serving in brothels for 1 year or less and 40.9% reporting brothel confinement for <6 months |
| Asia   | Silverman JG, Decker MR, Gupta J, Maheshwari A, Willis BM, Raj A. HIV prevalence and predictors of infection in sex-trafficked Nepalese girls and women. JAMA. 2007 Aug 1;298(5):536-42. PubMed PMID: 17666674.                            | Medical documentation and case record materials for all survivors of sex trafficking presenting to Maiti Nepal (Kathmandu, Nepal) were collected by the investigative team in January 2006.                                 | 287         | Repatriated girls and women reporting being trafficked from Nepal for sexual exploitation and receiving rehabilitative services | Median age at time of trafficking was 17 years (7 to 32). FORCED PROSTITUTION | Between January 1997 and December 2005 | Kathmandu, Nepal | The mean time served in brothels was 25.8 Months (median, 12.0 months)                                                                                                                     |

| Region | Reference                                                                                                                                                                                                                                         | Methodology                            | Sample size | Sample definition                                                                                                                                                                                                                 | Sample characteristics                                                                    | Year of data collection | Location                                                                                                                                                             | Duration of sex work                                                                                                       |
|--------|---------------------------------------------------------------------------------------------------------------------------------------------------------------------------------------------------------------------------------------------------|----------------------------------------|-------------|-----------------------------------------------------------------------------------------------------------------------------------------------------------------------------------------------------------------------------------|-------------------------------------------------------------------------------------------|-------------------------|----------------------------------------------------------------------------------------------------------------------------------------------------------------------|----------------------------------------------------------------------------------------------------------------------------|
| Asia   | Sopheab H, Gorbach PM, Gloyd S, Leng HB. Rural sex work in Cambodia: work characteristics, risk behaviours, HIV, and syphilis. Sex Transm Infect. 2003 Aug;79(4):e2. PubMed PMID: 12902610; PubMed Central PMCID: PMC1744694.                     | Cross-sectional study. Census.         | 71 FSWs.    | FSWs in provincial sex establishments (23 brothels and six karaokê bars in three districts)                                                                                                                                       | Mean age was 25 years.                                                                    | 2000                    | Rural Cambodia, in Kampong Chnnang province                                                                                                                          | Mean of 2 years.                                                                                                           |
| Asia   | Sopheab H, Morineau G, Neal J J, et al. Sustained high prevalence of sexually transmitted infections among female sex workers in Cambodia: high turnover seriously challenges the 100% condom use programme. BMC Infectious Diseases 2008, 8:167. | Data from Cambodia's national SSS 2005 | 1079 FSW    | Women mainly working at the brothels in the red light areas who have no other employment other than selling sex to clients. All women working in selected establishments and not menstruating at time of interview were eligible. | Most of them were young (55% aged 15–24) and new to sex work (60% had worked 12 ≤ months) | From March to May 2005  | 8 capital cities of the following provinces of Cambodia: Phnom Penh, Kampong Cham, Prey Veng, Battambang, Banteay Meanchey, Siem Reap, Koh Kong, and Sihanouk Ville. | The duration of sex work ranged from 1 month to 12 years, and 60% were "new FSWs" (having sold sex for 12 months or less). |

| Region | Reference                                                                                                                                                                                                          | Methodology                                                                                    | Sample size                          | Sample definition                                                                                                           | Sample characteristics                                               | Year of data collection              | Location                                  | Duration of sex work                                                                                                                                                                                                                                                      |
|--------|--------------------------------------------------------------------------------------------------------------------------------------------------------------------------------------------------------------------|------------------------------------------------------------------------------------------------|--------------------------------------|-----------------------------------------------------------------------------------------------------------------------------|----------------------------------------------------------------------|--------------------------------------|-------------------------------------------|---------------------------------------------------------------------------------------------------------------------------------------------------------------------------------------------------------------------------------------------------------------------------|
| Asia   | Taneeapanichskul S, Phuapradit W, Chaturachinda K. Association of contraceptives and HIV-1 infection in Thai female commercial sex workers. Aust N Z J Obstet Gynaecol. 1997 Feb;37(1):86-8. PubMed PMID: 9075554. | Case-control study to evaluate the association between contraceptive methods and HIV infection | 376 FSW                              | 118 cases of HIV-1 infected sex workers were eligible for inclusion and 258 HIV-1 negative women were recruited as controls | The mean age for cases was 22.8 +- 4.1 and for controls: 23.7+- 4.2. | October 1, 1993 to December 31, 1994 | Khon Kaen and Lumpang provinces, Thailand | 4.2% of cases were in sex work for less than a year, 31.4% from 1 to 2 years, 27.1% from 3 to 4 years and 37.3 for 5 or more years. 11.5% of controls were in sex work for less than a year, 31% from 1 to 2 years, 23.3% from 3 to 4 years and 34.1 for 5 or more years. |
| Asia   | Theng TS, Sen PR, Tan HH, et al. Seroprevalence of HSV-1 and 2 among sex workers attending a sexually transmitted infection clinic in Singapore. Int J STD AIDS. 2006 Jun;17(6):395-9.                             | Cross-sectiona study.                                                                          | 300. 297 FSW and 3 male transvestite | Brothel-based sex workers attending a sexually transmitted infection clinic in Singapore                                    | The mean age of the sex worker was 38.4 years (range 22-70 years).   | Between October 2003 and March 2004  | Singapore                                 | 32.3% were working for less than 5 years; 28% from 5 to 9 years; and, 39.7% for 10 years and more.                                                                                                                                                                        |

| Region | Reference                                                                                                                                                                                                                                                                      | Methodology           | Sample size | Sample definition                                                                                                                          | Sample characteristics                                       | Year of data collection                 | Location                                                     | Duration of sex work                                             |
|--------|--------------------------------------------------------------------------------------------------------------------------------------------------------------------------------------------------------------------------------------------------------------------------------|-----------------------|-------------|--------------------------------------------------------------------------------------------------------------------------------------------|--------------------------------------------------------------|-----------------------------------------|--------------------------------------------------------------|------------------------------------------------------------------|
| Asia   | Thuy NT, Nhung VT, Thuc NV, Lien TX, Khiem HB. HIV infection and risk factors among female sex workers in southern Vietnam. AIDS. 1998 Mar 5;12(4):425-32.                                                                                                                     | Cross-sectional study | 968 FSW     | newly enrolled female CSW in education centers.                                                                                            | Mean age was 26 (SD 7.6) ranged 12 to 60.                    | August 1995 to October 1996             | Ho Chi Minh City, Na Giang and Can Tho in Vietnam            | Mean of 20 months (SD 26.4 months) ranging from 1 to 120 months. |
| Asia   | Todd CS, Nasir A, Stanekzai MR, Bautista CT, Botros BA, Scott PT, Strathdee SA, Tjaden J. HIV, hepatitis B, and hepatitis C prevalence and associated risk behaviors among female sex workers in three Afghan cities. AIDS. 2010 Jul;24 Suppl 2:S69-75. PubMed PMID: 20610952. | Cross sectional study | 520 FSW     | Participants were those reported having sex work within the past 6 months, aged 18 years or greater, and able to provide informed consent. | Mean of age initiating sex work was 23.3 (SD: 5.1) years old | Between September 2006 and January 2008 | FSWs from Jalalabad, Kabul and Mazar-i-Sharif in Afghanistan | Median of 5 years.                                               |

| Region | Reference                                                                                                                                                                                                                                                                | Methodology                                           | Sample size | Sample definition                                                                                                                              | Sample characteristics                                                                                                                                                                                | Year of data collection             | Location                      | Duration of sex work                                                               |
|--------|--------------------------------------------------------------------------------------------------------------------------------------------------------------------------------------------------------------------------------------------------------------------------|-------------------------------------------------------|-------------|------------------------------------------------------------------------------------------------------------------------------------------------|-------------------------------------------------------------------------------------------------------------------------------------------------------------------------------------------------------|-------------------------------------|-------------------------------|------------------------------------------------------------------------------------|
| Asia   | Tran TN, Detels R, Long HT, Van Phung L, Lan HP. HIV infection and risk characteristics among female sex workers in Hanoi, Vietnam. J Acquir Immune Defic Syndr. 2005 Aug 15;39(5):581-6. PubMed PMID: 16044011; PubMed Central PMCID: PMC2908502                        | Cross-sectional survey using 2-stage cluster sampling | 400 FSW     | FSW in Hanoi who had traded sexual intercourse for money or gifts within the past 30 days.                                                     | The mean and median ages of subjects were 30.4 and 28.5 years, respectively, with age ranging from 16–56 years. The mean and median ages at first sexual experience were both 19 years (range 12–33). | From June to September 2002         | Hanoi, Vietnam                | The median duration in sex work was 2.3 years and ranged from 1 month to 21 years. |
| Asia   | van den Hoek A, Yuliang F, Dukers NH, Zhiheng C, Jiangting F, Lina Z, Xiuxing Z. High prevalence of syphilis and other sexually transmitted diseases among sex workers in China: potential for fast spread of HIV. AIDS. 2001 Apr 13;15(6):753-9. PubMed PMID: 11371690. | Cross-sectional study                                 | 966 FSW     | Sex workers outside detention who attended a program in order to promote STD/HIV knowledge and condom use, and to study the occurrence of STD. | The mean age of the women was 25 years.                                                                                                                                                               | From March 1998 to mid-October 1999 | Guangzhou in South-east China | The median duration of prostitution was one year,                                  |



| Region | Reference                                                                                                                                                                                                                                     | Methodology           | Sample size | Sample definition                                                                                      | Sample characteristics                                              | Year of data collection | Location                             | Duration of sex work                                                                                                                                                                                                                                                                 |
|--------|-----------------------------------------------------------------------------------------------------------------------------------------------------------------------------------------------------------------------------------------------|-----------------------|-------------|--------------------------------------------------------------------------------------------------------|---------------------------------------------------------------------|-------------------------|--------------------------------------|--------------------------------------------------------------------------------------------------------------------------------------------------------------------------------------------------------------------------------------------------------------------------------------|
| Asia   | Wang BO, Xiaoming LI, Stanton B, Yang H, Fang X, Zhao R, Dong B, Zhou Y, Liu W, Liang S. Vaginal Douching, Condom Use, and Sexually Transmitted Infections Among Chinese Female Sex Workers. Sex Transm Dis. 2005 November ; 32(11): 696–702. | Cross-sectional study | 454 FSW     | recruited from restaurants, barbershops, and hair-washing, rooms in 3 geographic locations in H County | Mean age was 23.5 (SD: 5.1). Mean number of clients was 2 per week. | 2004                    | Nanning, China                       | Mean of 12.2 months.                                                                                                                                                                                                                                                                 |
| Asia   | Wang H, Chen RY, Ding G, Ma Y, Ma J, Jiao JH, Wu Z, Sharp GB, Wang N. Prevalence and predictors of HIV infection among female sex workers in Kaiyuan City, Yunnan Province, China. Int J Infect Dis. 2009 Mar;13(2):162-9. Epub 2008 Aug 20.  | Cross-sectional study | 737 FSW     | Women $\geq 16$ years old, self-reported to have sold sex for money within the previous three months   |                                                                     | March-May 2006          | Kaiyuan City, Yunnan Province, China | the median duration of sex work was 19.4 months (IQR: 8.1–40.5 months). The median duration of sex work was 46 months for HIV-positive subjects and 18.5 months for those who were HIV-negative. < 1 year: 33.8%; 1 to 2 years: 38.4%; 3 to 4 years: 13.2%; 5 years and more: 14.7%. |

| Region | Reference                                                                                                                                                                  | Methodology                                                             | Sample size | Sample definition                                                                                                                           | Sample characteristics                                                                                                   | Year of data collection                 | Location                                                                                | Duration of sex work                                                 |
|--------|----------------------------------------------------------------------------------------------------------------------------------------------------------------------------|-------------------------------------------------------------------------|-------------|---------------------------------------------------------------------------------------------------------------------------------------------|--------------------------------------------------------------------------------------------------------------------------|-----------------------------------------|-----------------------------------------------------------------------------------------|----------------------------------------------------------------------|
| Asia   | Wong ML, Chan RK, Koh D, et al. A prospective study on condom slippage and breakage among female brothel-based sex workers in Singapore. Sex Transm Dis.2000;27(4):208-14. | A prospective study on condom breakage and slippage over a 1-day period | 219 FSW     | brothel-based sex workers attending health-education workshops on condom use and condom negotiation skills at the Department of STD control | Ages ranged from 21 to 49 years with a mean of 25.2 years and median of 24.                                              | From May to December 1997               | Singapore                                                                               | The median duration of sex work was 2 months (range, 1 to 42 months) |
| Asia   | Thuong NV, Nhung VT, Nghia KV, et al. HIV in five border provinces of Vietnam. Sex Transm Infect. 2005; 81: 477-479.                                                       | Cross-sectional study.                                                  | 911 FSWs    |                                                                                                                                             |                                                                                                                          | Between December 2002 and February 2003 | Five border provinces of Vietnam (Lai Chau, QuangTri, DongThap, AnGiang, and KienGiang) | 19.7% were working for 6 months or less                              |
| Asia   | Tran TT, Le CL, Nguyen TL. Factors Associated With Inconsistent Condom Use Among Female Sex Workers in Nha Trang, Vietnam. Asia Pac J Public Health. 2008;20(4):370-8.     | Cross-sectional with sampling by snowball                               | 192 FSWs    |                                                                                                                                             | Age: mean of 28.3, median of 27 and ranged from 17 to 56. Number of clients per week: mean of 7.7, ranging from 0 to 20. | 2005                                    | Nha Trang, Vietnam                                                                      | Mean of 5.4 years, median of 5 and range from 1 month to 22 years.   |

| Region | Reference                                                                                                                                                                                                                    | Methodology     | Sample size | Sample definition                                                   | Sample characteristics                  | Year of data collection | Location                                                                                 | Duration of sex work                                                                                                                                     |
|--------|------------------------------------------------------------------------------------------------------------------------------------------------------------------------------------------------------------------------------|-----------------|-------------|---------------------------------------------------------------------|-----------------------------------------|-------------------------|------------------------------------------------------------------------------------------|----------------------------------------------------------------------------------------------------------------------------------------------------------|
| Asia   | Nakashima K, Kashiwagi S, Hayashi J, et al. Sexual Transmission of Hepatitis C Virus among Female Prostitutes and Patients with Sexually Transmitted Diseases in Fukuoka, Kyushu, Japan. Am J Epidemiol. 1992;136(9):1132-7. | Cross-sectional | 282 FSWs    |                                                                     |                                         | 1989                    | Fukuoka, Japan                                                                           | 74.1% were sex workers for 1 year or more.                                                                                                               |
| Asia   | Simoes EA, Babu PG, Jeyakumari HM, John TJ. The Initial Detection of Human Immunodeficiency Virus 1 and Its Subsequent Spread in Prostitutes in Tamil Nadu, India. J Acquir Immune Defic Syndr. 1993 Sep;6(9):1030-4.        | Cross-sectional | 412 FSWs    | Incarcerated for performing physical sexual acts with men for money | Mean age of 24 years, ranging 18 to 54. | 1986                    | 6 major cities in India: Tiruchirapally, Vellore, Madras, Madurai, Coimbatore and Salem. | 8.3% were sex workers for less than a year; 22.3% from 2 to 2.9 years; 18.9 from 3 to 3.9 years; 15.8 from 4 to 4.9 years; and 34,7 for 5 or more years. |
