# Supplementary material for: Analysis of duration of risk behaviour for key populations: a literature review
Source: HighWire-hosted journal article supplement (doi:10.1136/sextrans-2012-050647), 2012-11-20
Supplement: sextrans-2012-050647supp_table3.pdf [file sextrans-2012-050647supp_table3.pdf]

Table S2. Data extracted from studies conducted in the Injected Drug Users population

| Region | Reference                                                                                                                                                                                                                                                                                      | Methodology     | Sample size                             | Sample definition                                                                                                                                                                                                                                                                                                                                                           | Age (years)                                                                       | Year of data collection           | Country  | Duration of injected drug using                                                                                                                |
|--------|------------------------------------------------------------------------------------------------------------------------------------------------------------------------------------------------------------------------------------------------------------------------------------------------|-----------------|-----------------------------------------|-----------------------------------------------------------------------------------------------------------------------------------------------------------------------------------------------------------------------------------------------------------------------------------------------------------------------------------------------------------------------------|-----------------------------------------------------------------------------------|-----------------------------------|----------|------------------------------------------------------------------------------------------------------------------------------------------------|
| Asia   | Buavirat A, Page-Shafer K, van Griensven GJ, Mandel JS, Evans J, Chuaratanaphong J, Chiamwongpat S, Sacks R, Moss A. Risk of prevalent HIV infection associated with incarceration among injecting drug users in Bangkok, Thailand: case-control study. <i>BMJ</i> . 2003 Feb 8;326(7384):308. | Case-control    | 347 (175 cases and 172 controls)        | IDU who had been incarcerated for at least six months during the previous five years. Case: HIV positive injecting drug user with a medical record documenting a negative HIV test within the five years before the most recent incarceration and HIV positive serostatus since the most recent release. Control: HIV negative injecting drug users 1 at least 8 years old. | Median: 29 (IQR: 25-36) years.                                                    | From August 2000 to January 2001  | Thailand | Median: for cases it was 9.2 (IQR: 7 - 13) and for controls: 8 (IQR: 6 - 13)                                                                   |
| Asia   | Go VF, Frangakis C, Nam LV, Sripaipan T, Bergenstrom A, Li F, Latkin C, Celentano DD, Quan VM. Characteristics of High-Risk HIV-Positive IDUs in Vietnam: Implications for Future Interventions. <i>Subst Use Misuse</i> . 2010 Aug 24                                                         | Cross-sectional | 299                                     |                                                                                                                                                                                                                                                                                                                                                                             | Median: 27 (IQR: 23–32)                                                           | Between August and September 2003 | Vietnam  | Median: 3 (IQR 2–6)                                                                                                                            |
| Asia   | Kermode M, Singh LB, Raju RK, et al. Injections for health-related reasons amongst injecting drug users in New Delhi and Imphal, India. <i>Public Health</i> . 2006 Jul;120(7):634-40.                                                                                                         | Cross-sectional | 200 (100 in Impal and 100 in New Dheli) |                                                                                                                                                                                                                                                                                                                                                                             | Mean: overall it was 29 (SD: 7.5) for Impal IDU was 30.2 and for New Dheli, 28.9. | 2004                              | India    | Mean: overall it was 6, for the IDU in Impal, 10 and for the ones in New Dheli, 1.9. Median: for overall it was 3.5 (range: 0.04–24, SD: 6.1). |

| Region | Reference                                                                                                                                                                                                                                                                | Methodology     | Sample size | Sample definition                                                                                                                                                                                                                                                          | Age (years)               | Year of data collection | Country    | Duration of injected drug using  |
|--------|--------------------------------------------------------------------------------------------------------------------------------------------------------------------------------------------------------------------------------------------------------------------------|-----------------|-------------|----------------------------------------------------------------------------------------------------------------------------------------------------------------------------------------------------------------------------------------------------------------------------|---------------------------|-------------------------|------------|----------------------------------|
| Asia   | Lee KC, Lim WW, Lee SS. High prevalence of HCV in a cohort of injectors on methadone substitution treatment. J Clin Virol. 2008 Apr;41(4):297-300. Epub 2008 Jan 10.                                                                                                     | Cross-sectional | 567         | IDUs attending Methadone clinics (MCs) that were attended by at least 200 drug users per day or 40 per hour. Inclusion criteria were 1. ever injected illicit drug, 2. agreed to be interviewed and 3. to undergo venesection to produce a blood sample.                   | Median: 49                | 2006                    | China      | Median: 17                       |
| Asia   | Wright NH, Vanichseni S, Akarasewi P, et al. Was the 1988 HIV epidemic among Bangkok's injecting drug users a common source outbreak? AIDS. 1994 Apr;8(4):529-32.                                                                                                        | Cross-sectional | 1901        |                                                                                                                                                                                                                                                                            |                           | 1988                    | Thailand   | 9.8% injected for 1 year or less |
| Asia   | Azim T, Chowdhury EI, Reza M, et al. Prevalence of infections, HIV risk behaviors and factors associated with HIV infection among male injecting drug users attending a needle/syringe exchange program in Dhaka, Bangladesh. Subst Use Misuse. 2008 Dec;43(14):2124-44. | Cohort          | 561         | Inclusion criteria were 1. being 15 years and older, 2. having a history of injecting drugs at least once in the last 2 months, 3. being a member of the NSEP of CARE Bangladesh and 4. not having changed the area or neighborhood, where they lived in the last 6 months | Median: 35 (IQR: 29.5–40) | 2002                    | Bangladesh | Median: 14 (IQR: 10–20)          |

| Region | Reference                                                                                                                                                                                                   | Methodology     | Sample size | Sample definition                                                                                                                                                                             | Age (years)              | Year of data collection             | Country     | Duration of injected drug using |
|--------|-------------------------------------------------------------------------------------------------------------------------------------------------------------------------------------------------------------|-----------------|-------------|-----------------------------------------------------------------------------------------------------------------------------------------------------------------------------------------------|--------------------------|-------------------------------------|-------------|---------------------------------|
| Asia   | Bautista CT, Todd CS, Abed AM, et al. Effects of duration of injection drug use and age at first injection on HCV among IDU in Kabul, Afghanistan. J Public Health (Oxf). 2010 Sep;32(3):336-41.            | Cross-sectional | 459         | IDUs who reported injection drug use in the last 6 months and were at least 18 years old.                                                                                                     | Mean: 30.4 (SD: 7.7)     | June 2005 to June 2006              | Afghanistan | Mean: 4.2 (SD: 3.6)             |
| Asia   | Beyrer C, Patel Z, Stachowiak JA, et al. Characterization of the emerging HIV type 1 and HCV epidemics among injecting drug users in Dushanbe, Tajikistan. AIDS Res Hum Retroviruses. 2009 Sep;25(9):853-60 |                 | 491         | Eligible study participants 1. were 17 years of age and over, 2. had injected within the previous month, 3. were Russian and/or Tajik speaking, and 4. were able to provide informed consent. | Median: 31 (IQR: 26–39)  | From May to November 2004           | Tajikistan  | Median: 5 (IQR: 2–9)            |
| Asia   | Niccolai LM, Verevchkin SV, Toussova OV, et al. Estimates of HIV incidence among drug users in St. Petersburg, Russia: continued growth of a rapidly expanding epidemic. Eur J Public Health. 2010 Aug 26.  | Cross-sectional | 691         | Eligibility for inclusion in the present analysis included reporting a history of ever injecting drugs.                                                                                       | Median: 29 (range 18–53) | From November 2005 to December 2008 | Russia      | Median: 8 (range: 1–36)         |

| Region | Reference                                                                                                                                                                                                              | Methodology     | Sample size                                                                                  | Sample definition                                                                                                                                                  | Age (years)               | Year of data collection | Country | Duration of injected drug using                                                                                                |
|--------|------------------------------------------------------------------------------------------------------------------------------------------------------------------------------------------------------------------------|-----------------|----------------------------------------------------------------------------------------------|--------------------------------------------------------------------------------------------------------------------------------------------------------------------|---------------------------|-------------------------|---------|--------------------------------------------------------------------------------------------------------------------------------|
| Asia   | Mahanta J, Medhi GK, Paranjape RS, et al. Injecting and sexual risk behaviours, sexually transmitted infections and HIV prevalence in injecting drug users in three states in India. AIDS. 2008 Dec;22 Suppl 5:S59-68. | Cross-sectional | 2075 (419 in Churachandpu, 420 in Bishnupur, 440 in Phek, 420 in Wokha, 376 in Mumbai/Thane. | Inclusion criteria: 1. be a man, 2. 18 years or older, and 3. who injected addictive substances/drugs for non-medical purposes at least once in the past 6 months. |                           | Not mentioned           | India   | % that injected for 1 year or less: 4.5 in Churachandpu, 27.3 in Bishnupur, 42.1 in Phek, 11.1 in Wokha, 21.3 in Mumbai/Thane. |
| Asia   | Quan VM, Go VF, Nam le V, et al. Risks for HIV, HBV, and HCV infections among male injection drug users in northern Vietnam: a case-control study. AIDS Care. 2009 Jan;21(1):7-16.                                     | Case-control    | 309                                                                                          | IDUs who were 18 to 45 years old and who reported having injected drugs in the prior six months were eligible for study enrollment.                                | Median: 27 (range: 18-45) | 2003                    | Vietnam | Median: 3 (range: 1-18)                                                                                                        |
| Asia   | Lee KC, Lim WW, Lee SS. High prevalence of HCV in a cohort of injectors on methadone substitution treatment. J Clin Virol. 2008 Apr;41(4):297-300.                                                                     | Cross-sectional | 567                                                                                          | IDU attending methadone clinics that were attended by at least 200 drug users per day or 40 per hour.                                                              | Median: 49                | 2006                    | China   | Median: 17                                                                                                                     |

| Region | Reference                                                                                                                                                                                                                                      | Methodology     | Sample size                | Sample definition                                                                                                                                                                      | Age (years)                                                                                 | Year of data collection            | Country     | Duration of injected drug using |
|--------|------------------------------------------------------------------------------------------------------------------------------------------------------------------------------------------------------------------------------------------------|-----------------|----------------------------|----------------------------------------------------------------------------------------------------------------------------------------------------------------------------------------|---------------------------------------------------------------------------------------------|------------------------------------|-------------|---------------------------------|
| Asia   | Todd CS, Abed AM, Scott PT, et al. Correlates of receptive and distributive needle sharing among injection drug users in Kabul, Afghanistan. Am J Drug Alcohol Abuse. 2008;34(1):91-100.                                                       | Cross-sectional | 464                        | Eligible participants reported injecting drugs within the past six months (confirmed through injection stigmata), were 18 years or greater, and were able to provide informed consent. | Mean: 30.6                                                                                  | Between June 2005 and June 2006    | Afghanistan | Mean: 4.4 years (IQR: 2–6)      |
| Asia   | Altaf A, Shah SA, Zaidi NA, et al. High risk behaviors of injection drug users registered with harm reduction programme in Karachi, Pakistan. Harm Reduct J. 2007;10;4:7                                                                       | Cross-sectional | 161                        | Registered IDUs of a needle exchange and harm reduction programme.                                                                                                                     | Mean: 35.9 (range: 18–63)                                                                   | 2003                               | Pakistan.   | Tmean: 4.4                      |
| Asia   | Azim T, Chowdhury EI, Reza M, et al. Vulnerability to HIV infection among sex worker and non-sex worker female injecting drug users in Dhaka, Bangladesh: evidence from the baseline survey of a cohort study. Harm Reduct J. 2006 Nov 17;3:33 | Cohort          | 130, 82 FSW and 48 non-FSW | All women 15 years and older with a history of injecting drugs at least once in the last six months were eligible for enrolment.                                                       | Median: for IDU sex workers was 27 (IQR: 23–33.3) and for non-sex workers 30 (IQR: 24–39.5) | Between December 2004 and May 2005 | Bangladesh  | Median: 2 for both groups       |

| Region | Reference                                                                                                                                                                | Methodology     | Sample size | Sample definition                                                                                                                                                                               | Age (years)         | Year of data collection             | Country | Duration of injected drug using                                                                       |
|--------|--------------------------------------------------------------------------------------------------------------------------------------------------------------------------|-----------------|-------------|-------------------------------------------------------------------------------------------------------------------------------------------------------------------------------------------------|---------------------|-------------------------------------|---------|-------------------------------------------------------------------------------------------------------|
| Asia   | Zhao M, Du J, Lu GH, Wang QY, Xu H, Zhu M, McCoy CB. HIV sexual risk behaviors among injection drug users in Shanghai. . Drug Alcohol Depend. 2006 Apr;82 Suppl 1:S43-7. | Cross-sectional | 141         | IDU admitted to the Shanghai Drug Abuse Treatment Center who were at least 18 years old, sexually active in the previous 3 months and met the DSM-IV diagnostic criteria for opiate dependence. | Mean: 30.1 (SD:8.1) | Between October 2004 and March 2005 | China   | The participants reported having injected heroin on a daily basis for a mean of 2.4 years (SD = 2.3). |

| Region | Reference                                                                                                                                                                      | Methodology               | Sample size                                                                                      | Sample definition                                                                                                   | Age (years)                      | Year of data collection                     | Country  | Duration of injected drug using                                               |
|--------|--------------------------------------------------------------------------------------------------------------------------------------------------------------------------------|---------------------------|--------------------------------------------------------------------------------------------------|---------------------------------------------------------------------------------------------------------------------|----------------------------------|---------------------------------------------|----------|-------------------------------------------------------------------------------|
| Europe | Calleja T, Casanueva Gutiérrez M, González C. Perfil de los usuarios de drogas ingresados en un hospital. An Med Interna (Madrid) 2003; 20: 504-509                            | Descriptive-retrospective | 111                                                                                              | Patients admitted to the Hospital de Cabueñ aged 15 to 65 years old whose medical report showed that they were UDI. | Mean: 33.6 (range: 19-49) years. | From January 1st 1999 to December 31st 1999 | Spain    | Mean: from 9.7 to 13.7 years depending on the pathology presented             |
| Europe | Cassin S, Geoghegan T, Cox G. Young injectors: a comparative analysis of risk behaviour. Ir J Med Sci. 1998;167(4):234-7.                                                      | Cross-sectional           | 770 (485 young injectors - less than 25 years old- and 285 old injectors - 25 years old or more) | Total population of new clients attending the Health Promotion Unit                                                 |                                  | Between May 1st 1997 and February 28th 1998 | Ireland  | Mean: for young 65.71 weeks (SD:87.71) and for old, 269.08 weeks (SD: 333.64) |
| Europe | Copeland L, Budd J, Robertson JR, Elton RA. Changing patterns in causes of death in a cohort of injecting drug users, 1980-2001. Arch Intern Med. 2004 Jun 14;164(11):1214-20. | Cohort                    | 153                                                                                              | Patients known to have ever injected drugs were recruited                                                           |                                  | 1980 - 2001                                 | Scotland | Mean time from first injection until death was 13.9 years                     |

| Region | Reference                                                                                                                                                                                                                      | Methodology     | Sample size | Sample definition                                                                                                                                                                                                      | Age (years)                                            | Year of data collection                      | Country | Duration of injected drug using (years)                                                                                           |
|--------|--------------------------------------------------------------------------------------------------------------------------------------------------------------------------------------------------------------------------------|-----------------|-------------|------------------------------------------------------------------------------------------------------------------------------------------------------------------------------------------------------------------------|--------------------------------------------------------|----------------------------------------------|---------|-----------------------------------------------------------------------------------------------------------------------------------|
| Europe | Dolan KA, Donoghoe MC, Stimson GV. Reductions in HIV risk behaviour and stable HIV prevalence in syringe-exchange clients and other injectors in England. Drug Alcohol Rev. 1993;12(2):133-42.                                 | Cohort          | 207         | IDUs from four syringe-exchange schemes and IDUs not attending SES                                                                                                                                                     | Mean: for attendees it was 30.2 and non attendees 28.8 | 1989                                         | England | Mean: for attendees it was 10.6 and for non-attendees, 9. Calculated by subtracting from the mean age, the age at first injection |
| Europe | Lidman C, Norden L, Kåberg M, et al. Hepatitis C infection among injection drug users in Stockholm Sweden: prevalence and gender. Scand J Infect Dis. 2009;41(9):679-84.                                                       | Cross-sectional | 310         | IDU from 6 units that care for drug users. The inclusion criteria were 1. age 18 y or older, 2. history of ever injecting drugs. Exclusion criteria were known HIV infection and previous participation in this study. | Mean: 35.6 (range: 18-67)                              | From March 2004 to June 2006                 | Sweden  | Mean:12.1 (range: 0-41)                                                                                                           |
| Europe | Muga R, Roca J, Egea JM, Tor J, Sirera G, Rey-Joly C, Muñoz A. Mortality of HIV-positive and HIV-negative heroin abusers as a function of duration of injecting drug use. J Acquir Immune Defic Syndr. 2000 Apr 1;23(4):332-8. | Cohort          | 376         | Injecting heroin users referred from outpatient clinics of metropolitan Barcelona.                                                                                                                                     | Mean age at entry was 26 (range 16-46)                 | Between February of 1987 and January of 1991 | Spain   | Mean: 6.1 (range: 0.1-15)                                                                                                         |

| Region | Reference                                                                                                                                                                                                                           | Methodology     | Sample size                                                                    | Sample definition                                                                                                                                                | Age (years)                                                                                                                          | Year of data collection             | Country | Duration of injected drug using (years)                                                                                                                                         |
|--------|-------------------------------------------------------------------------------------------------------------------------------------------------------------------------------------------------------------------------------------|-----------------|--------------------------------------------------------------------------------|------------------------------------------------------------------------------------------------------------------------------------------------------------------|--------------------------------------------------------------------------------------------------------------------------------------|-------------------------------------|---------|---------------------------------------------------------------------------------------------------------------------------------------------------------------------------------|
| Europe | Rhodes T, Donoghoe M, Hunter G, et al. Sexual behaviour of drug injectors in London: implications for HIV transmission and HIV prevention. <i>Addiction</i> . 1994;89(9):1085-96.                                                   | Cross-sectional | 516 (270 in treatment, 104 previously in treatment and 138 never in treatment) |                                                                                                                                                                  | Mean: for never in treatment it was 28, for currently in treatment , 32 and for the ones with previous experience in treatment , 30. | 1991                                | England | Mean: for never in treatment it was 9, for currently in treatment it was 12 and for those with previous experience in treatment, 12.<br><br>60.7% injected for less than 1 year |
| Europe | Smyth BP, Keenan E, O'Connor JJ. Evaluation of the impact of Dublin's expanded harm reduction programme on prevalence of hepatitis C among short-term injecting drug users. <i>J Epidemiol Community Health</i> . 1999;53(7):434-5. | Cross-sectional | 353                                                                            | New attenders, resident in Dublin, with a reported injecting history less than 25 months, tested for anti-HCV between July 1993 and December 1996 were included. |                                                                                                                                      | Between July 1993 and December 1996 | Ireland |                                                                                                                                                                                 |

| Region | Reference                                                                                                                                                                                                                                                               | Methodology     | Sample size                               | Sample definition                                                                                                                                                                                                                          | Age (years)                                                            | Year of data collection                                                                         | Country               | Duration of injected drug using (years)                        |
|--------|-------------------------------------------------------------------------------------------------------------------------------------------------------------------------------------------------------------------------------------------------------------------------|-----------------|-------------------------------------------|--------------------------------------------------------------------------------------------------------------------------------------------------------------------------------------------------------------------------------------------|------------------------------------------------------------------------|-------------------------------------------------------------------------------------------------|-----------------------|----------------------------------------------------------------|
| Europe | Steffen T, Blättler R, Gutzwiller F, et al. HIV and hepatitis virus infections among injecting drug users in a medically controlled heroin prescription programme. Eur J Public Health. 2001;11(4):425-30.                                                              | Cohort          | 1035                                      | Individuals in the heroin-assisted treatment programme with at least 20 years old, at least two years of opiate dependence and at least two unsuccessful treatment attempts, with documented deficiencies in a medical and/or social area. | Mean: 30.8 (SD: 5.7)                                                   | 1994 to 1996                                                                                    | Switzerland           | Mean: 10.5 (SD: 5.5).                                          |
| Europe | Karapetyan AF, Sokolovsky YV, Araviyskaya ER, et al. Syphilis among intravenous drug-using population: epidemiological situation in St. Petersburg, Russia. Int J STD & AIDS 2002; 13:618–623.                                                                          | Cross-sectional | 105                                       | Syphilis-positive IDU participating in the Vozvrastcheniye programme                                                                                                                                                                       |                                                                        | 1998                                                                                            | Russia                | 8% injected for less than a year                               |
| Europe | Gyarmathy VA, Neaigus A, Li N, Ujhelyi E, et al. Infection disclosure in the injecting dyads of Hungarian and Lithuanian injecting drug users who self-reported being infected with hepatitis C virus or human immunodeficiency virus. Scand J Infect Dis. 2010 Sep 15. | Cross-sectional | 515 (215 in Hungary and 300 in Lithuania) | Street based and attendees of NEP who self-report drug injecting in the past 30 days and were at least 18 years old.                                                                                                                       | Mean: in Hungary it was 27.9 (SD: 6.5) and in Lithuania 29.8 (SD: 7.6) | In Budapest between October 2005 and December 2006. In Vilnius between March 2008 and May 2009. | Hungary and Lithuania | Mean: in Hungary 7.4 (SD: 5.3) and in Lithuania 10.1 (SD: 6.7) |

| Region | Reference                                                                                                                                                                                                            | Methodology     | Sample size                                      | Sample definition                                                                                                             | Age (years)                                                                                   | Year of data collection | Country | Duration of injected drug using                                          |
|--------|----------------------------------------------------------------------------------------------------------------------------------------------------------------------------------------------------------------------|-----------------|--------------------------------------------------|-------------------------------------------------------------------------------------------------------------------------------|-----------------------------------------------------------------------------------------------|-------------------------|---------|--------------------------------------------------------------------------|
| Europe | Kolarić B, Stajduhar D, Gajnik D, et al. Seroprevalence of blood-borne infections and population sizes estimates in a population of injecting drug users in Croatia. Cent Eur J Public Health. 2010 Jun;18(2):104-9. | Cross-sectional | 401 (121 in Split, 130 in Zagreb, 150 in Rijeka) | The inclusion criteria were: 1. had injected at least once in the last 12 months, and 2. no participation in previous survey. | Median in Zagreb it was 30 (IQR: 26-33), Rijeka 26 (IQR: 24-30) and in Split, 29 (IQR: 26-35) | 2007                    | Croatia | Median: Zagreb 5 (IQR: 1–10), Rijeka 7 (IQR: 4–10), Split 10 (IQR: 5–15) |
| Europe | Vlahov D, Safaien M, Lai S, Strathdee SA, et al. Sexual and drug risk-related behaviours after initiating highly active antiretroviral therapy among injection drug users. AIDS. 2001 Nov 23;15(17):2311-6.          | Cross-sectional | 288                                              | Heroin IDUs from Greece participating in a drug-treatment programme at the Eginitio Psychiatric Hospital.                     | Mean: 29.3 (SD: 6.2, range: 17-58)                                                            | Not mentioned           | Greece  | Mean: 8.2 (SD: 5.9)                                                      |
| Europe | Hickman M, Hope V, Brady T, et al. Hepatitis C virus (HCV) prevalence, and injecting risk behaviour in multiple sites in England in 2004. J Viral Hepat. 2007 Sep;14(9):645-52.                                      | Cross-sectional | 1058                                             |                                                                                                                               | Mean: 31                                                                                      | 2005                    | England | Mean: 10.5                                                               |

| Region | Reference                                                                                                                                                                                                                                                | Methodology     | Sample size                                      | Sample definition                                                                                                                                                             | Age (years)             | Year of data collection       | Country | Duration of injected drug using                                       |
|--------|----------------------------------------------------------------------------------------------------------------------------------------------------------------------------------------------------------------------------------------------------------|-----------------|--------------------------------------------------|-------------------------------------------------------------------------------------------------------------------------------------------------------------------------------|-------------------------|-------------------------------|---------|-----------------------------------------------------------------------|
| Europe | Folch C, Meroño M, Casabona J. Factors associated with sharing syringes among street-recruited injecting drug users. . Med Clin (Barc). 2006 Oct 14;127(14):526-32.                                                                                      | Cross-sectional | 300                                              | Criteria for inclusion: 1. had injected drugs in the last 2 months, and 2. had not received treatment in the last 3 months.                                                   | Mean: 30.2 (SD: 5.1)    | 2004                          | Spain   | Mean: 11,6 (6,4)                                                      |
| Europe | Kivelä P, Krol A, Simola S, Vaattovaara M, Tuomola P, Brummer-Korvenkontio H, Ristola M. HIV outbreak among injecting drug users in the Helsinki region: social and geographical pockets. . Eur J Public Health. 2007 Aug;17(4):381-6. Epub 2006 Nov 27. | Cohort          | 176 (98 early HIV cases and 47 recent HIV cases) | IDU who were HIV positive.                                                                                                                                                    | Mean: 33 (range: 16–63) | From 1998 until 2003          | Finland | Mean: for recent cases it was 14.3 and for earlier cases, 10.7 years. |
| Europe | Booth RE, Kwiatkowski CF, Brewster JT, Sinitsyna L, Dvoryak S. AIDS. 2006 Nov 14;20(17):2217-23. Predictors of HIV sero-status among drug injectors at three Ukraine sites.                                                                              | Cross-sectional | 891                                              | Self-reported drug injection in the previous 30 days, at least 18 years of age and not too intoxicated or otherwise incapacitated to comprehend and provide informed consent. | Mean: 28.9 (SD: 7.3)    | From June 2004 to August 2005 | Ukraine | Mean: 10.2 (SD: 6.8)                                                  |

| Region | Reference                                                                                                                                                                                                                                                                                               | Methodology     | Sample size                                                                                                       | Sample definition                                                                                                                                                                                                           | Age (years) | Year of data collection                 | Country            | Duration of injected drug using                                                                                          |
|--------|---------------------------------------------------------------------------------------------------------------------------------------------------------------------------------------------------------------------------------------------------------------------------------------------------------|-----------------|-------------------------------------------------------------------------------------------------------------------|-----------------------------------------------------------------------------------------------------------------------------------------------------------------------------------------------------------------------------|-------------|-----------------------------------------|--------------------|--------------------------------------------------------------------------------------------------------------------------|
| Europe | Stormer A, Tun W, Guli L, Harxhi A, Bodanovskaia Z, Yakovleva A, Rusakova M, Levina O, Bani R, Rjepaj K, Bino S. An analysis of respondent driven sampling with Injection Drug Users (IDU) in Albania and the Russian Federation. J Urban Health. 2006 Nov;83(6 Suppl):i73-82.                          | Cross-sectional | 410. 210 in Tirana and 200 in St. Petersburg                                                                      | Participants had to be at least 15 years old and report having injected drugs recreationally in the past 6 months.                                                                                                          |             | Between July and August 2005            | Albania and Russia | % injecting for less than a year: 21 (IC95%: 11, 24) in Albania and 6 (IC95%: 3, 9) in Russia                            |
| Europe | Muga R, Sanvisens A, Bolao F, Tor J, Santesmases J, Pujol R, Tural C, Langohr K, Rey-Joly C, Muñoz A. Significant reductions of HIV prevalence but not of hepatitis C virus infections in injection drug users from metropolitan Barcelona: 1987-2001. Drug Alcohol Depend. 2006 Apr;82 Suppl 1:S29-33. | Cross-sectional | 2219(divided by period of admission .1987-1989:452. 1990-1992: 560.1993-1995:525. 1996-1998: 395.1999: 2001: 287) | All IDU admitted between February 1987 and December 2001 to the detoxification units of two major hospitals (Hospital Universitari Germans Trias i Pujol and Hospital Universitari de Bellvitge) in metropolitan Barcelona. |             | Between February 1987 and December 2001 | Spain              | Mean (SD): 1987-1989: 6.3 (3.1), 1990-1992: 7.1 (3.6), 1993-1995:7.4 (5.0), 1996-1998: 8.0 (5.6), 1999-2001: 10.2 (6.6). |

| Region | Reference                                                                                                                                                                                                                                                                     | Methodology     | Sample size                                     | Sample definition                                                                                                                                                       | Age (years)                                                                                                                        | Year of data collection           | Country | Duration of injected drug using                                                                                                                                |
|--------|-------------------------------------------------------------------------------------------------------------------------------------------------------------------------------------------------------------------------------------------------------------------------------|-----------------|-------------------------------------------------|-------------------------------------------------------------------------------------------------------------------------------------------------------------------------|------------------------------------------------------------------------------------------------------------------------------------|-----------------------------------|---------|----------------------------------------------------------------------------------------------------------------------------------------------------------------|
| Europe | Backmund M, Meyer K, Schuetz C, Reimer J. Factors associated with exposure to hepatitis B virus in injection drug users. Drug Alcohol Depend. 2006 Sep 15;84(2):154-9. Epub 2006 Feb 14.                                                                                      |                 | 1018                                            | Patients were included in the study, in case both criteria 1. opioid dependency, and 2. confirmed needle-sharing at least once were met                                 | Mean: 28.3 (SD: 6.1)                                                                                                               | From April 1991 until April 1997  | Germany | Mean: 7.7 (SD: 5.6). Calculated by subtracting from the mean age, the mean age at first injection                                                              |
| Europe | Platt L, Rhodes T, Lowndes CM, et al. Impact of gender and sex work on sexual and injecting risk behaviors and their association with HIV positivity among injecting drug users in an HIV epidemic in Togliatti City, Russian Federation. Sex Transm Dis. 2005;32(10):605-12. | Cross-sectional | 426, 268 Male IDU, 89 FIDU non SW and 66 FSWIDU | IDU were those who injected within the last 4 weeks and sex work was defined as having exchanged anal, vaginal, or oral sex for money or goods within the last 4 weeks. | Mean: for male IDU it was 26.8 (SD: 7.1), for the female IDU non SW it was 23.8 (SD: 5.4) and for the FSWIDU it was 23.8 (SD: 4.7) | 2001                              | Russia  | Mean: for males it was 7.9, for Non FSWIDU it was 5.6 and for FSWIDU it was 6.4. Calculated by subtracting from the mean age, the mean age at first injection. |
| Europe | Gyarmathy VA, Neaigus A. Marginalized and socially integrated groups of IDUs in Hungary: potential bridges of HIV infection. J Urban Health. 2005 Sep;82(3 Suppl 4):iv101-12.                                                                                                 | Cross-sectional | 29                                              | Eligible participants were those who 1. self-reported injecting drugs at least once in the past 30 days, and 2. were 30 years of age or younger.                        | Mean: 23.6 (SD: 3.6)                                                                                                               | Between May 2003 and January 2004 | Hungary | Mean: 6.8 (SD: 2.7)                                                                                                                                            |

| Region | Reference                                                                                                                                                     | Methodology     | Sample size | Sample definition                                                                                                    | Age (years) | Year of data collection | Country | Duration of injected drug using    |
|--------|---------------------------------------------------------------------------------------------------------------------------------------------------------------|-----------------|-------------|----------------------------------------------------------------------------------------------------------------------|-------------|-------------------------|---------|------------------------------------|
| Europe | Maliphant J, Scott J. Use of the femoral vein ('groin injecting') by a sample of needle exchange clients in Bristol, UK. . Harm Reduct J. 2005 Apr 15;2(1):6. | Cross-sectional | 92          | All clients who used the needle exchange services staffed by the interviewer were invited to take part in the study. |             | 2004                    | England | Mean: 9.6 (SD: 7.0, range: 0.5-30) |

| Region        | Reference                                                                                                                                                                                                                                                                                        | Methodology     | Sample size | Sample definition                                                                                                                                        | Age (years)                                                         | Year of data collection | Country | Duration of injected drug using                                                         |
|---------------|--------------------------------------------------------------------------------------------------------------------------------------------------------------------------------------------------------------------------------------------------------------------------------------------------|-----------------|-------------|----------------------------------------------------------------------------------------------------------------------------------------------------------|---------------------------------------------------------------------|-------------------------|---------|-----------------------------------------------------------------------------------------|
| South America | de Azevedo RC, Botega NJ, Guimarães LA. Crack users, sexual behavior and risk of HIV infection. Rev Bras Psiquiatr. 2007 Mar;29(1):26-30.                                                                                                                                                        | Cross-sectional | 109         | Injecting cocaine users. The inclusion criteria were: 1. literate individuals, 2. > 16 years old and 3. use of injecting cocaine over the last 12 months | Mean: 27.5 (SD: 7.1)                                                |                         | Brazil  | Mean: 9.5 (SD:6.4)                                                                      |
| South America | Marchesini AM, Prá-Baldi ZP, Mesquita F, Bueno R, Buchalla CM. Hepatitis B and C among injecting drug users living with HIV in São Paulo, Brazil]. Rev Saude Publica. 2007 Dec;41 Suppl 2:57-63.                                                                                                 | Cross-sectional | 205         | IDU living with HIV/AIDS in treatment at facilities of the Municipal STD/AIDS Health Department of São Paulo.                                            | Mean: 39 (SD: 6.1)                                                  | 2003                    | Brazil  | Mean: 21. Calculated by subtracting from the mean age, the mean age at first injection. |
| South America | Dourado I, Andrade T, Carpenter C, Galvao-Castro B. Risk Factors for Human T Cell Lymphotropic Virus Type I among Injecting Drug Users in Northeast Brazil: Possibly Greater Efficiency of Male to Female Transmission. Mem Inst Oswaldo Cruz, Rio de Janeiro, Vol. 94(1): 13-18, Jan./Feb. 1999 | Cross-sectional | 216         |                                                                                                                                                          | Mean: 24.6 and 27.4 for males and females respectively at baseline. | 1994 to 1996            | Brazil  | Median: 6 for males and 8 for females.                                                  |

| Region        | Reference                                                                                                                                                                                                                                                                                                      | Methodology     | Sample size                            | Sample definition                                                                                                                                                                                                     | Age (years)                                                         | Year of data collection               | Country | Duration of injected drug using                                      |
|---------------|----------------------------------------------------------------------------------------------------------------------------------------------------------------------------------------------------------------------------------------------------------------------------------------------------------------|-----------------|----------------------------------------|-----------------------------------------------------------------------------------------------------------------------------------------------------------------------------------------------------------------------|---------------------------------------------------------------------|---------------------------------------|---------|----------------------------------------------------------------------|
| South America | Lima ES, Friedman SR, Bastos FI, Telles PR, Friedmann P, Ward TP, des Jarlais DC. Risk factors for HIV-1 seroprevalence among drug injectors in the cocaine-using environment of Rio de Janeiro. <i>Addiction</i> . 1994 Jun;89(6):689-98.                                                                     | Cross-sectional | 123                                    | Respondents were recruited both in drug treatment centers and in the streets were eligible to be interviewed and HIV antibody tested if they had injected drugs at least once in the 2 months prior to the interview. | Mean: 29.3 (SD = 5.7)                                               | Between September 1989 and April 1992 | Brazil  | Average number of years injected drugs was 10.4 (SD: 6.3)            |
| South America | Oliveira Mde L, Bastos FI, Telles PR, Hacker Mde A, Oliveira SA, Miguel JC, Yoshida CF. Epidemiological and genetic analyses of Hepatitis C virus transmission among young/short- and long-term injecting drug users from Rio de Janeiro, Brazil. <i>J Clin Virol</i> . 2009 Mar;44(3):200-6. Epub 2009 Feb 4. | Cross-sectional | 606 (299 short- and 307 long-term IDU) |                                                                                                                                                                                                                       | Mean: 27.4 (SD: 8.8) in short term and 36.7 (SD: 8.3) in long term. | From 1999 to 2001                     | Brazil  | Mean: 2.2 (SD: 1.9) for short term and 16.1 (SD: 7.7) for long term. |

| Region        | Reference                                                                                                                                                                                                                                                                                                                                                                                                       | Methodology     | Sample size                                                                                            | Sample definition           | Age (years)                                                                                     | Year of data collection                  | Country | Duration of injected drug using                                                         |
|---------------|-----------------------------------------------------------------------------------------------------------------------------------------------------------------------------------------------------------------------------------------------------------------------------------------------------------------------------------------------------------------------------------------------------------------|-----------------|--------------------------------------------------------------------------------------------------------|-----------------------------|-------------------------------------------------------------------------------------------------|------------------------------------------|---------|-----------------------------------------------------------------------------------------|
| South America | Caiaffa WT, Bastos FI, Freitas LL, Mingoti SA, Proietti FA, Carneiro-Proietti AB, Gandolfi D, Doneda D; Projeto AjUDE-Brasil I; Projeto AjUDE-Brasil II. The contribution of two Brazilian multi-center studies to the assessment of HIV and HCV infection and prevention strategies among injecting drug users: the AjUDE-Brasil I and II Projects. Cad Saude Publica. 2006 Apr;22(4):771-82. Epub 2006 Apr 5. | Cross-sectional | 1144 (287 were recruited during the AjUDE-Brasil I Project and 857 during the AjUDE-Brasil II Project. | Non-institutionalized IDUs. | Mean: for the AjUDE-Brasil I it was 29.2 (SD: 7.9) and for the AjUDE-Brasil II, 28.5 (SD: 8.2). | Ajude I: 1998.<br>Ajude II: 2000 to 2001 | Brazil  | Mean: for AjUDE-Brasil I it was 11.6 (SD: 7.6) and for . AjUDE-Brasil II: 9.8 (SD: 7.7) |

| Region | Reference                                                                                                                                                                                                       | Methodology     | Sample size | Sample definition                                                                                                                                                                                                               | Age (years)                                                 | Year of data collection              | Country  | Duration of injected drug using (years)                                                  |
|--------|-----------------------------------------------------------------------------------------------------------------------------------------------------------------------------------------------------------------|-----------------|-------------|---------------------------------------------------------------------------------------------------------------------------------------------------------------------------------------------------------------------------------|-------------------------------------------------------------|--------------------------------------|----------|------------------------------------------------------------------------------------------|
| Africa | McCurdy SA, Ross MW, Williams ML, Kilonzo GP, Leshabari MT. Flashblood: blood sharing among female injecting drug users in Tanzania. Addiction. 2010 Jun;105(6):1062-70. Epub 2010 Mar 12.                      | Cross-sectional | 169         | Participants should be at least aged 18 years, have injected heroin during the 48 hours before our screening and have engaged in sex at least once during the 30 days before screening.                                         | Mean: 25.6 (SD: 5.5)                                        | Between May 2005 and September 2006. | Tanzania | Mean: 2.8. Calculated by subtracting from the mean age, the mean age at first injection. |
| Africa | Ross M, McCurdy S, Kilonzo G, Williams M, Leshabari M. Drug Use Careers and Blood-borne Pathogen Risk Behavior in Male and Female Tanzanian Heroin Injectors. Am. J. Trop. Med. Hyg., 79(3), 2008, pp. 338–343. | Cross-sectional | 534         | Eligibility criteria required that participants 1. were at least 18 years of age, 2. had injected an illicit drug in the past 48 hours before being screened, and 3. had had sex at least once in the 30 days before screening. | From 18 to 59 years (mean age: 27.9 years, median 27 years) | From May 2005 through September 2006 | Tanzania | Mean: 3.7. Median: 3. 18% started injecting in less than a year.                         |

| Region  | Reference                                                                                                                                                                                                                    | Methodology     | Sample size | Sample definition                                                                            | Age (years)        | Year of data collection     | Country   | Duration of injected drug using (years)                                              |
|---------|------------------------------------------------------------------------------------------------------------------------------------------------------------------------------------------------------------------------------|-----------------|-------------|----------------------------------------------------------------------------------------------|--------------------|-----------------------------|-----------|--------------------------------------------------------------------------------------|
| Oceania | Darke S, Kelly E, Ross J. Drug driving among injecting drug users in Sydney, Australia: prevalence, risk factors and risk perceptions. <i>Addiction</i> . 2004 Feb;99(2):175-85.                                             | Cross-sectional | 300         | IDU aged 18 or over and to have injected a drug in the previous 6 months                     | Mean: 31.8         | From April to November 2002 | Australia | Mean: 12.4. Calculated by subtracting from the mean age, the age at first injection. |
| Oceania | Day C, Conroy E, Lowe J, Page J, Dolan K. Patterns of drug use and associated harms among rural injecting drug users: comparisons with metropolitan injecting drug users. <i>Aust J Rural Health</i> . 2006 Jun;14(3):120-5. | Cross-sectional | 260         | IDU recruited through needle and syringe programs, snowballing techniques and advertisement. | Mean: 33           | Not mentioned               | Australia | Mean: 15. Calculated by subtracting from the mean age, the age at first injection.   |
| Oceania | Iversen J, Wand H, Gonnermann A, Maher L. Gender differences in hepatitis C antibody prevalence and risk behaviours amongst people who inject drugs in Australia 1998-2008. <i>Int J Drug Policy</i> . 2010 May 14.          | Cross-sectional | 15852       | Attending selected NSP sites                                                                 | Mean: 31 (SD: 8.8) | 1998–2008                   | Australia | Mean: 11. Calculated by subtracting from the mean age, the age at first injection.   |
| Oceania | Lenton S, Kerry K, Loxley W, Tan-Quigley A, Greig R. Citizens who inject drugs: the 'Fitpack' study. <i>Int J Drug Policy</i> . 2000 Aug;11(4):285-97.                                                                       | Cross-sectional | 511         | Drug injectors with little or no prior drug treatment that used Fitpack.                     | Mean: 26.2         | 1995                        | Australia | Mean: 7.1.                                                                           |

| Region  | Reference                                                                                                                                                                                                                        | Methodology     | Sample size | Sample definition                                                                                                                                                                          | Age (years)                        | Year of data collection                              | Country   | Duration of injected drug using (years)                                                  |
|---------|----------------------------------------------------------------------------------------------------------------------------------------------------------------------------------------------------------------------------------|-----------------|-------------|--------------------------------------------------------------------------------------------------------------------------------------------------------------------------------------------|------------------------------------|------------------------------------------------------|-----------|------------------------------------------------------------------------------------------|
| Oceania | Maher L, Li J, Jalaludin B, Chant KG, Kaldor JM. High hepatitis C incidence in new injecting drug users: a policy failure? Aust N Z J Public Health. 2007 Feb;31(1):30-5.                                                        | Cohort          | 204         | Eligibility criteria for the study were that participants had injected drugs in the past six months and were unaware of their antibody HCV status or knew their serostatus to be negative. | Mean: 21.8 (SD: 4.05)              | Between 1999 and 2002                                | Australia | 19.12% started injecting in less than a year                                             |
| Oceania | White JM, Dyer KR, Ali RL, Gaughwin MD, Cormack S. Injecting behaviour and risky needle use amongst methadone maintenance clients. Drug Alcohol Depend. 1994 Jan;34(2):113-9.                                                    | Cohort          | 111         | IDU attending methadone maintenance program.                                                                                                                                               | Mean: 30.1 (SD: 5.3, range: 19-45) | August of 1991                                       | Australia | Mean: 7.0 (SD: 5.7; range: 1-21)                                                         |
| Oceania | Miller ER, Hellard ME, Bowden S, Bharadwaj M, Aitken CK. Markers and risk factors for HCV, HBV and HIV in a network of injecting drug users in Melbourne, Australia. J Infect. 2009 May;58(5):375-82. Epub 2009 Mar 27.          | Cross-sectional | 328         | Street based IDU.                                                                                                                                                                          | Median: 25.3 (range: 14.4-53)      | July 2005 to May 2007                                | Australia | Median: 7.6 (range: 0.17-36)                                                             |
| Oceania | Stoové MA, Dietze PM, Aitken CK, Jolley D. Mortality among injecting drug users in Melbourne: a 16-year follow-up of the Victorian Injecting Cohort Study (VICS). Drug Alcohol Depend. 2008 Aug 1;96(3):281-5. Epub 2008 Apr 22. | Cohort          | 626         |                                                                                                                                                                                            | Mean: 28 (SD: 6.6)                 | Recruited between 1990 and 1995, followed until 2006 | Australia | Mean: 17 (SD: 7.05, range: 3.86-29.79). The average length of injecting career at death. |

| Region  | Reference                                                                                                                                                                                                                                                                     | Methodology     | Sample size                                                                                                                        | Sample definition                                                                                                                                                                                                                                                                                 | Age (years)                                                                                            | Year of data collection                 | Country   | Duration of injected drug using (years)                        |
|---------|-------------------------------------------------------------------------------------------------------------------------------------------------------------------------------------------------------------------------------------------------------------------------------|-----------------|------------------------------------------------------------------------------------------------------------------------------------|---------------------------------------------------------------------------------------------------------------------------------------------------------------------------------------------------------------------------------------------------------------------------------------------------|--------------------------------------------------------------------------------------------------------|-----------------------------------------|-----------|----------------------------------------------------------------|
| Oceania | Bryant J, Treloar C. Initiators: an examination of young injecting drug users who initiate others to injecting. . AIDS Behav. 2008 Nov;12(6):885-90. Epub 2007 Dec 21.                                                                                                        | Cross-sectional | 324 (55 IDU who have initiated others into IDU and 269 non-initiators)                                                             | Eligibility criteria included: 1. current or recent injecting drug use (within previous 6 months), 2. injecting history of 5 years or less, and 3. aged 16–25 years.                                                                                                                              | 20.6 years for non initiators and 21.9 for initiators.                                                 | Between December 2000 and February 2002 | Australia | 2.4 for non initiators and 3.2 for initiators                  |
| Oceania | Hellard ME, Nguyen OK, Guy RJ, Jardine D, Mijch A, Higgs PG. The prevalence and risk behaviours associated with the transmission of blood-borne viruses among ethnic-Vietnamese injecting drug users. AUSTRALIAN AND NEW ZEALAND JOURNAL OF PUBLIC HEALTH. 2006 vol. 30 no. 6 | Cross-sectional | 127                                                                                                                                | Candidates were eligible to participate in the study if they were ethnic-Vietnamese and had injected drugs in the previous 12 months.                                                                                                                                                             | Median: for male participants was 26 (range: 15-51) and for female participants was 22 (range: 15-30). | 2003                                    | Australia | Median: 4.1 (range: 0.05-21.6)                                 |
| Oceania | Cao W, Treloar C. Comparison of needle and syringe programme attendees and non-attendees from a high drug-using area in Sydney, New South Wales. Drug Alcohol Rev. 2006 Sep;25(5):439-44.                                                                                     | Cross-sectional | 264 (102 who had never attended a NSP (non-NSP attendees) and 162 participants who had previous experience of NSP (NSP attendees). | Non-NSP: people who either lived, worked or visited South East Sydney, had injected drugs at least once in the 6 months prior to the study and did not use a NSP as their primary source of injecting equipment were eligible for inclusion in the study. NSP: All clients attending selected NSP | Non-NSP attendees were younger than NSP attendees (29 vs. 33 years).                                   | 2003                                    |           | Mean: for non-NSP attendees it was 8 and for NSP attendees, 14 |

| Region  | Reference                                                                                                                                                                                                | Methodology     | Sample size                                 | Sample definition                                                                                                                                                                                                                                                                              | Age (years)                                                          | Year of data collection | Country   | Duration of injected drug using (years)                                                 |
|---------|----------------------------------------------------------------------------------------------------------------------------------------------------------------------------------------------------------|-----------------|---------------------------------------------|------------------------------------------------------------------------------------------------------------------------------------------------------------------------------------------------------------------------------------------------------------------------------------------------|----------------------------------------------------------------------|-------------------------|-----------|-----------------------------------------------------------------------------------------|
| Oceania | Roxburgh A, Degenhardt L, Breen C. Drug use and risk behaviours among injecting drug users: a comparison between sex workers and non-sex workers in Sydney, Australia. Harm Reduct J. 2005 Jun 6;2(1):7. | Cross-sectional | 154 (22 IDU sex workers and 132 IDU non SW) | Eligibility criteria for entry into the study were: 1. at least monthly injection in the six months preceding the interview, 2. residence in Sydney for twelve months preceding the interview, with no significant periods of incarceration or residence in inpatient rehabilitation programs. | Mean: for IDUSW it was 32 and for the IDU non sex workers it was 33. | 2003                    | Australia | Mean: for SW: 14.4 and for NSW, 12.7. Mean calculated by subtracting from the mean age. |

| Region        | Reference                                                                                                                                                                                 | Methodology | Sample size | Sample definition                                                                                                                                                                                                                                                                             | Age (years)                                                     | Year of data collection                      | Country | Duration of injected drug using (years)                                                                         |
|---------------|-------------------------------------------------------------------------------------------------------------------------------------------------------------------------------------------|-------------|-------------|-----------------------------------------------------------------------------------------------------------------------------------------------------------------------------------------------------------------------------------------------------------------------------------------------|-----------------------------------------------------------------|----------------------------------------------|---------|-----------------------------------------------------------------------------------------------------------------|
| North America | Chitwood DD, Comerford M, Kitner KR, Palacios W, Sanchez J. A comparison of HIV risk behaviors between new and long-term injection drug users. Subst Use Misuse. 2001 Jan;36(1-2):91-111. | Cohort      | 600         | 300 New IDUs (NIDU) who had initiated injection within 4 years before recruitment and who had injected at least weekly for the previous 6 months; 2) 300 Later IDUs (LIDU) who had initiated injection before January 1, 1984, and who had injected at least weekly for the previous 6 months | Mean: for New IDUs it was 32 compared with 42.8 for Later IDUs. | Recruited between July 1997 and August 1999. | USA     | NIDU: mean 1.9 years. LTIDU: mean 23.9. Calculated by subtracting from the mean age, the age at first injection |
| North America | Corsi KF, Lehman WK, Booth RE. The effect of methadone maintenance on positive outcomes for opiate injection drug users. J Subst Abuse Treat. 2009 Sep;37(2):120-6. Epub 2009 Jan 15.     | Cohort      | 160         | People who self-reported opiate injection in the prior 30 days; were 18 years of age or older; did not self-reported substance abuse treatment during the previous 30 days                                                                                                                    | Mean: 39                                                        | From 2000 through 2004                       | USA     | Mean: 19                                                                                                        |
| North America | Debeck K, Kerr T, Bird L, et al. Injection drug use cessation and use of North America's first medically supervised safer injecting facility. Drug Alcohol Depend. 2010 Aug 26            | Cohort      | 902         | IDU in supervised injecting facility (SIF)                                                                                                                                                                                                                                                    | Median: 39 (IQR: 33-45)                                         | Between December 2003 and June 2006          | Canada  | Median: 17 (IQR: 9-26)                                                                                          |

| Region        | Reference                                                                                                                                                                                                                                 | Methodology                 | Sample size                                                                               | Sample definition                                                                                                                 | Age (years)                                                                                        | Year of data collection                 | Country | Duration of injected drug using (years)                                                                   |
|---------------|-------------------------------------------------------------------------------------------------------------------------------------------------------------------------------------------------------------------------------------------|-----------------------------|-------------------------------------------------------------------------------------------|-----------------------------------------------------------------------------------------------------------------------------------|----------------------------------------------------------------------------------------------------|-----------------------------------------|---------|-----------------------------------------------------------------------------------------------------------|
| North America | Doherty MC, Garfein RS, Monterroso E, Brown D, Vlahov D. Correlates of HIV infection among young adult short-term injection drug users. AIDS. 2000 Apr 14;14(6):717-26.                                                                   | Cohort                      | 229                                                                                       | Inclusion criteria: 1. age 18 to 29 years and 2. having injected within the year preceding enrollment                             | Mean: 22.8 (range: 18-29)                                                                          | From August 1994 through May 1996       | USA     | Median: 3                                                                                                 |
| North America | Garfein RS, Doherty MC, Monterroso ER, Thomas DL, Nelson KE, Vlahov D. Prevalence and incidence of hepatitis C virus infection among young adult injection drug users. J Acquir Immune Defic Syndr Hum Retrovirol. 1998;18 Suppl 1:S11-9. | Randomized controlled trial | 854 (431 in peer educational intervention group and 423 in video discussion intervention) | HIV and HCV antibody negative IDU, who used drugs in the last 6 months, aged 15–30 years, recruited in five United States cities. | Mean: for peer educational group it was 23.8 (SD: 3.5), for video discussion group, 23.8 (SD: 3.7) | Between May 2002 and January 2004       | USA     | Mean: for peer educational group it was 4.2 (SD: 3.4) and for video discussion group it was 4.4 (SD: 3.5) |
| North America | Hahn JA, Page-Shafer K, Lum PJ, Ochoa K, Moss AR. Hepatitis C virus infection and needle exchange use among young injection drug users in San Francisco. Hepatology. 2001 Jul;34(1):180-7.                                                | Cross-sectional             | 312                                                                                       | Under age 30, reported injecting drugs in the prior month, and spoke English as their primary language                            | Median: 22 (IQR: 20-25)                                                                            | Between November 1997 and February 1999 | USA     | Median: 5 (IQR: 2-8). 14.6% started injecting for less than a year                                        |

| Region        | Reference                                                                                                                                                                                                                         | Methodology | Sample size                                                    | Sample definition                                                                                                                                                             | Age (years)                                                                                                    | Year of data collection | Country | Duration of injected drug using (years)                                                                                                 |
|---------------|-----------------------------------------------------------------------------------------------------------------------------------------------------------------------------------------------------------------------------------|-------------|----------------------------------------------------------------|-------------------------------------------------------------------------------------------------------------------------------------------------------------------------------|----------------------------------------------------------------------------------------------------------------|-------------------------|---------|-----------------------------------------------------------------------------------------------------------------------------------------|
| North America | Huo D, Bailey SL, Ouellet LJ. Cessation of injection drug use and change in injection frequency: the Chicago Needle Exchange Evaluation Study. Addiction. 2006 Nov;101(11):1606-13.                                               | Cohort      | 707 (591 who continued injection and 116 who ceased injection) | Eligible participants had to 1. have injected drugs in the past 6 months, 2. speak English or Spanish and 3. be at least 18 years old                                         | Mean: 41 (SD: 10) among those who continued injecting and 36 (SD: 11) among the ones who had ceased injecting. | Between 1997 and 2000   | USA     | Mean: for those who still inject it was 15 (SD: 17) and for those who ceased it was 9.5 (SD: 18)                                        |
| North America | Mehta SH, Galai N, Astemborski J, et al. HIV incidence among injection drug users in Baltimore, Maryland (1988-2004). J Acquir Immune Defic Syndr. 2006 Nov 1;43(3):368-72.                                                       | Cohort      | 1983                                                           | All participants acknowledged 1. nonmedical injection drug use within the prior 11 years, 2. were 18 years of age or older, and 3. were free of AIDS at entry into the study. | Median age at enrollment it was 35 (IQR: 30-40)                                                                | Between 1988 and 1989   | USA     | Median: 14 (IQR: 6-20)                                                                                                                  |
| North America | Miller CL, Johnston C, Spittal PM, Li K, Laliberté N, Montaner JS, Schechter MT. Opportunities for prevention: hepatitis C prevalence and incidence in a cohort of young injection drug users. Hepatology. 2002 Sep;36(3):737-42. | Cohort      | 234 (107 HCV positive and 127 HCV negative)                    | IDU residing in the city of Vancouver and surrounding municipalities, having injected in the previous month, and aged 13 years and older.                                     | Median: for the HCV positive it was 22 (IQR: 20-23) and for the HCV negative it was 20 (IQR: 18-22)            | Since 1996              | Canada  | Median: for HCV+ it was 4 (IQR, 2-7) and for HCV -1.3 (IQR: 0.3-3).<br><br>% started injecting for less than a year: HCV+: 20. HCV-: 51 |

| Region        | Reference                                                                                                                                                                                                                                        | Methodology     | Sample size | Sample definition                                                                                                                                                                                                                  | Age (years)           | Year of data collection              | Country | Duration of injected drug using (years)                                            |
|---------------|--------------------------------------------------------------------------------------------------------------------------------------------------------------------------------------------------------------------------------------------------|-----------------|-------------|------------------------------------------------------------------------------------------------------------------------------------------------------------------------------------------------------------------------------------|-----------------------|--------------------------------------|---------|------------------------------------------------------------------------------------|
| North America | Neaigus A, Friedman SR, Jose B, et al. High-risk personal networks and syringe sharing as risk factors for HIV infection among new drug injectors. J Acquir Immune Defic Syndr Hum Retrovirol. 1996 Apr 15;11(5):499-509.                        | Cross-sectional | 174         | Street-recruited new IDUs in the Bushwick section of Brooklyn in New York City. Subjects recruited for the study had to be 1. $\geq 18$ years of age and 2. had to have injected drugs within the 12 months prior to the interview | Mean: 30              | Between July 1991 and January 1993   | USA     | Mean: 2.6 (SD:1.7). Median: 1.0.<br><br>17% started injecting for less than a year |
| North America | Pouget ER, Deren S, Fuller CM, et al. Receptive syringe sharing among injection drug users in Harlem and the Bronx during the New York State Expanded Syringe Access Demonstration Program. J Acquir Immune Defic Syndr. 2005 Aug 1;39(4):471-7. | Cross-sectional | 1181        |                                                                                                                                                                                                                                    | Mean: 37.4 (SD: 8.60) | From January 2001 through June /2003 | USA     | Mean: 16.2 (SD: 10.24)                                                             |

| Region        | Reference                                                                                                                                                                                                       | Methodology     | Sample size | Sample definition                                                                                                                                                                                                                                                                                      | Age (years)                         | Year of data collection         | Country | Duration of injected drug using (years)                         |
|---------------|-----------------------------------------------------------------------------------------------------------------------------------------------------------------------------------------------------------------|-----------------|-------------|--------------------------------------------------------------------------------------------------------------------------------------------------------------------------------------------------------------------------------------------------------------------------------------------------------|-------------------------------------|---------------------------------|---------|-----------------------------------------------------------------|
| North America | Roy E, Boudreau JF, Boivin JF. Hepatitis C virus incidence among young street-involved IDUs in relation to injection experience. Drug Alcohol Depend. 2009 Jun 1;102(1-3):158-61. Epub 2009 Feb 28.             | Cohort          | 160         | Participants were included if in the last year, they had either been without a place to sleep more than once, or regularly used the services of street youth agencies (drop-in centers, shelters or outreach vans); they were 14–23 years of age; had ever injected drugs and spoke French or English. | Mean 20 (range: 15–26) at baseline. | From July 2001 to December 2005 | Canada  | Median: 2.7<br><br>27.5% started injecting for less than a year |
| North America | Schütz CG, Rapiti E, Vlahov D, Anthony JC. Suspected determinants of enrollment into detoxification and methadone maintenance treatment among injecting drug users. Drug Alcohol Depend. 1994 Oct;36(2):129-38. | Cross-sectional | 2879        | Eligibility for enrollment in the study included 1. age of 18 years or older, and 2. a history of injecting illicit drugs at any time within the previous 11 years.                                                                                                                                    | Median: 34                          | Between 1988 and 1989           | USA     | Median: 12                                                      |

| Region        | Reference                                                                                                                                                                                                   | Methodology | Sample size | Sample definition                                                                                                                                                                                                                                                                                                                                                                                                                                                  | Age (years)                         | Year of data collection | Country | Duration of injected drug using (years) |
|---------------|-------------------------------------------------------------------------------------------------------------------------------------------------------------------------------------------------------------|-------------|-------------|--------------------------------------------------------------------------------------------------------------------------------------------------------------------------------------------------------------------------------------------------------------------------------------------------------------------------------------------------------------------------------------------------------------------------------------------------------------------|-------------------------------------|-------------------------|---------|-----------------------------------------|
| North America | Steensma C, Boivin JF, Blais L, Roy E. Cessation of injecting drug use among street-based youth. J Urban Health. 2005 Dec;82(4):622-37. Epub 2005 Sep 29.                                                   | Cohort      |             | Elegibility criteria were 1. being "street active," 2. between 14 and 25 years of age, 3. English or French speaking, 4. able to provide informed consent and 5. complete a questionnaire, reported having injected drugs at least once within the 6 months before entry into the MSYC study, or reported no injecting experience before entry into the MSYC study but subsequently reported injecting drugs at least once in at least one follow-up questionnaire | Mean: 20 (SD: 2.5; range:14.1-25.7) |                         | Canada  | Mean: 2.9 (SD: 2.5, range: 0.1-14.7)    |
| North America | Vlahov D, Safaien M, Lai S, Strathdee SA, et al. Sexual and drug risk-related behaviours after initiating highly active antiretroviral therapy among injection drug users. AIDS. 2001 Nov 23;15(17):2311-6. | Cohort      | 316         | IDU who were HAART eligible.                                                                                                                                                                                                                                                                                                                                                                                                                                       |                                     | 1996 to 1998            | USA     | Median: 13                              |

| Region        | Reference                                                                                                                                                                                                                                                                                                                   | Methodology | Sample size | Sample definition                                                                                                                                  | Age (years)             | Year of data collection                 | Country | Duration of injected drug using (years)                                                                                                                                                                    |
|---------------|-----------------------------------------------------------------------------------------------------------------------------------------------------------------------------------------------------------------------------------------------------------------------------------------------------------------------------|-------------|-------------|----------------------------------------------------------------------------------------------------------------------------------------------------|-------------------------|-----------------------------------------|---------|------------------------------------------------------------------------------------------------------------------------------------------------------------------------------------------------------------|
| North America | Wood E, Stoltz JA, Zhang R, Strathdee SA, Montaner JS, Kerr T. Circumstances of first crystal methamphetamine use and initiation of injection drug use among high-risk youth. Drug Alcohol Rev. 2008 May;27(3):270-6.                                                                                                       | Cohort      | 201         | Eligibility criteria for the study included 1. age 14 – 26 years at baseline and 2. use of illicit drugs other than marijuana in the past 30 days. |                         | Between September 2005 and October 2006 | Canada  | Median: for those whose first injection experience involved crystal methamphetamine it was 4.6, for those who initiated injecting with heroin, 8.3 and for those who initiated injecting with cocaine, 7.4 |
| North America | Evans JL, Hahn JA, Lum PJ, Stein ES, Page K. Predictors of injection drug use cessation and relapse in a prospective cohort of young injection drug users in San Francisco, CA (UFO Study). Drug Alcohol Depend. 2009 May 1;101(3):152-7. Epub 2009 Jan 31. Drug Alcohol Depend. 2009 May 1;101(3):152-7. Epub 2009 Jan 31. | Cohort      | 365         | street based IDUs under the age of 30                                                                                                              | Median: 22 (IQR: 20–26) | From January 2000 through February 2008 | USA     | Median: 3.6 (IQR: 1.3–6.5)                                                                                                                                                                                 |

| Region        | Reference                                                                                                                                                                                                                                      | Methodology     | Sample size | Sample definition                                                                                                                                                    | Age (years)                   | Year of data collection                  | Country | Duration of injected drug using (years) |
|---------------|------------------------------------------------------------------------------------------------------------------------------------------------------------------------------------------------------------------------------------------------|-----------------|-------------|----------------------------------------------------------------------------------------------------------------------------------------------------------------------|-------------------------------|------------------------------------------|---------|-----------------------------------------|
| North America | Lum PJ, Hahn JA, Shafer KP, et al. Hepatitis B virus infection and immunization status in a new generation of injection drug users in San Francisco. J Viral Hepat. 2008;15(3):229-36.                                                         | Cross-sectional | 831         | Eligible persons reported a history of injecting drug use in the last 30 days and an age of 29 years or under.                                                       | Median: 22 years (IQR: 20–25) | From January 2000 to January 2002        | USA     | Median: 4 (IQR: 2–7)                    |
| North America | Shaw SY, Shah L, Jolly AM, et al. Determinants of injection drug user (IDU) syringe sharing: the relationship between availability of syringes and risk network member characteristics in Winnipeg, Canada. . Addiction. 2007;102(10):1626-35. | Cross-sectional | 435         | Eligibility criteria included self-reported use of illicit injection drugs in the 6-month period prior to interview and age 15 years or more.                        | Mean: 34.9 (SD: 9.9)          | December 2003 to September 2004          | Canada  | Mean: 13.8 (SD: 9.9)                    |
| North America | Neaigus A, Gyarmathy VA, Miller M, et al. Injecting and sexual risk correlates of HBV and HCV seroprevalence among new drug injectors. Drug Alcohol Depend. 2007;10;89(2-3):234-43. Epub 2007 Feb 7.                                           | Cross-sectional | 259         | Eligible participants were between 18 and 30 years of age, had initiated drug injecting within the prior six years, and had injected drugs within the prior 30 days. | Mean: 22.8 (SD: 3.3)          | Between February 1999 and February 2003, | USA     | Mean: 2.9                               |

| Region        | Reference                                                                                                                                                                                                                                       | Methodology     | Sample size | Sample definition                                                                                                                                                                                                                           | Age (years)                                | Year of data collection                  | Country | Duration of injected drug using (years) |
|---------------|-------------------------------------------------------------------------------------------------------------------------------------------------------------------------------------------------------------------------------------------------|-----------------|-------------|---------------------------------------------------------------------------------------------------------------------------------------------------------------------------------------------------------------------------------------------|--------------------------------------------|------------------------------------------|---------|-----------------------------------------|
| North America | Hagan H, Campbell J, Thiede H, et al. Self-reported hepatitis C virus antibody status and risk behavior in young injectors. Public Health Rep. 2006 Nov-Dec;121(6):710-9.                                                                       | Cross-sectional | 3,004       | Individuals aged 15 to 30 years old who reported injection of any illicit drug in the previous six months.                                                                                                                                  | Mean: 23.8 (median: 24)                    | From May 2002 to January 2004            | USA     | Mean: 5. Median: 4.                     |
| North America | Miller CL, Kerr T, Strathdee SA, Li K, Wood E. Factors associated with premature mortality among young injection drug users in Vancouver. Harm Reduct J. 2007 Jan 4;4:1                                                                         | Cohort          | 572         | Persons were eligible if they had injected illicit drugs at least once in the previous month confirmed by track site inspection, were aged 14 years and older and resided in the greater Vancouver region and were 29 years old or younger. | Median: 23.9 (IQR: 20.9–26.3) at baseline. | Between May 1996 and December 2004       | Canada  | Median: 4 (IQR: 1.5–8)                  |
| North America | Wylie JL, Shah L, Jolly AM. Demographic, risk behaviour and personal network variables associated with prevalent hepatitis C, hepatitis B, and HIV infection in injection drug users in Winnipeg, Canada. BMC Public Health. 2006 Sep 13;6:229. | Cross-sectional | 369         | Eligibility criteria were 1. self-reported use of illicit injection drugs in the 6 month period prior to interview and 2. age 15 years or more.                                                                                             |                                            | Between December 2003 and September 2004 | Canada  | Median: 13 (IQR: 6–21)                  |

| Region        | Reference                                                                                                                                                                                                  | Methodology     | Sample size                                                      | Sample definition                                                                                                                                                                                | Age (years)                                                                                    | Year of data collection       | Country | Duration of injected drug using (years)                                                       |
|---------------|------------------------------------------------------------------------------------------------------------------------------------------------------------------------------------------------------------|-----------------|------------------------------------------------------------------|--------------------------------------------------------------------------------------------------------------------------------------------------------------------------------------------------|------------------------------------------------------------------------------------------------|-------------------------------|---------|-----------------------------------------------------------------------------------------------|
| North America | Miller CL, Strathdee SA, Spittal PM, Kerr T, Li K, Schechter MT, Wood E. Elevated rates of HIV infection among young Aboriginal injection drug users in a Canadian setting. Harm Reduct J. 2006 Mar 8;3:9. | Cohort          | 291, 80 (27%) were Aboriginal and 211 (73%) were non-Aboriginal. | IDU aged 24 years and younger.                                                                                                                                                                   | Median: for the Aboriginal it was 16 (IQR: 14–18) and for the non-Aboriginal, 17 (IQR: 15–19). | Between May 1996 and May 2003 | Canada  | Median: for Aboriginal youth was 5 (IQR: 2–8) and for non-aboriginal, 3 (IQR: 1–5).           |
| North America | Pugatch D, Anderson BJ, O'Connell JV, Elson LC, Stein MD. HIV and HCV testing for young drug users in Rhode Island. J Adolesc Health. 2006 Mar;38(3):302-4.                                                | Cross-sectional | 86, 42 who were not tested for HCV and 44 who were tested        | Eligibility for the current analysis included: 1. age 18–25 years, 2. heroin or cocaine injection in the past 30 days, and 3. providing informed consent.                                        | Mean: for the tested was 23.05 (SD: 1.95), and for the not tested, 22.09 (SD: 1.82).           | March 2001 to February 2004   | USA     | Mean: for the ones who were tested, 3.8 (SD: 2.93) and for the not tested, 2.9 (SD: 2.42).    |
| North America | Lum PJ, Sears C, Guydish J. Injection risk behavior among women syringe exchangers in San Francisco. Subst Use Misuse. 2005;40(11):1681-96                                                                 | Cross-sectional | 149                                                              | Eligibility criteria were 1. self-reported age greater than 17 years, 2. history of drug injection during the preceding 30 days, and 3. syringe exchange at that site on the day of recruitment. | Median: 38 (IQR: 28–45)                                                                        | 1997                          | USA     | Median: 18. Calculated by subtracting from the median age, the median age at first injection. |
